# Supplementary material
Source: PubMed Central journal article supplement (PMC6339573)

**Supplementary Table 1.** HR-MS data for orfamides, canucins, keratinimicins, and keratinicyclins.<sup>a</sup>

| <b>Orfamide</b>       | <b>Formula</b>                                                                 | <b>[M+H]<sup>+</sup><sub>calc</sub></b> | <b>[M+H]<sup>+</sup><sub>obs</sub></b> | <b>Δppm</b> |
|-----------------------|--------------------------------------------------------------------------------|-----------------------------------------|----------------------------------------|-------------|
| A                     | C <sub>64</sub> H <sub>114</sub> N <sub>10</sub> O <sub>17</sub>               | 1295.84362                              | 1295.84380                             | 0.1         |
| B                     | C <sub>63</sub> H <sub>112</sub> N <sub>10</sub> O <sub>17</sub>               | 1281.82797                              | 1281.83038                             | 1.9         |
| <b>Canucin</b>        | <b>Formula</b>                                                                 | <b>[M+H]<sup>+</sup><sub>calc</sub></b> | <b>[M+H]<sup>+</sup><sub>obs</sub></b> | <b>Δppm</b> |
| A                     | C <sub>79</sub> H <sub>102</sub> N <sub>16</sub> O <sub>19</sub>               | 1579.75799                              | 1579.75592                             | 1.3         |
| B                     | C <sub>79</sub> H <sub>102</sub> N <sub>16</sub> O <sub>18</sub>               | 1563.76308                              | 1563.76242                             | 0.4         |
| <b>Keratinimicin</b>  |                                                                                | <b>[M+H]<sup>+</sup><sub>calc</sub></b> | <b>[M+H]<sup>+</sup><sub>obs</sub></b> | <b>Δppm</b> |
| A                     | C <sub>84</sub> H <sub>92</sub> Cl <sub>2</sub> N <sub>8</sub> O <sub>33</sub> | 1811.52166                              | 1811.52091                             | 0.4         |
| B                     | C <sub>78</sub> H <sub>83</sub> Cl <sub>2</sub> N <sub>9</sub> O <sub>26</sub> | 1632.48991                              | 1632.49397                             | 2.5         |
| C                     | C <sub>84</sub> H <sub>90</sub> Cl <sub>2</sub> N <sub>8</sub> O <sub>32</sub> | 1793.51109                              | 1793.50422                             | 3.8         |
| D                     | C <sub>84</sub> H <sub>89</sub> Cl <sub>2</sub> N <sub>7</sub> O <sub>34</sub> | 1810.49002                              | 1810.48720                             | 1.6         |
| <b>Keratinicyclin</b> |                                                                                | <b>[M+H]<sup>+</sup><sub>calc</sub></b> | <b>[M+H]<sup>+</sup><sub>obs</sub></b> | <b>Δppm</b> |
| A                     | C <sub>77</sub> H <sub>84</sub> ClN <sub>7</sub> O <sub>32</sub>               | 1654.49222                              | 1654.49089                             | 0.8         |
| B                     | C <sub>77</sub> H <sub>85</sub> ClN <sub>8</sub> O <sub>30</sub>               | 1637.51329                              | 1637.51130                             | 1.2         |
| C                     | C <sub>71</sub> H <sub>75</sub> ClN <sub>8</sub> O <sub>25</sub>               | 1475.46046                              | 1475.45782                             | 1.8         |

<sup>a</sup>[M+H]<sup>+</sup><sub>calc</sub> and [M+H]<sup>+</sup><sub>obs</sub> denote calculated and observed [M+H]<sup>+</sup>, respectively. Δppm denotes the mass error in parts per million.

**Supplementary Table 2.** NMR assignments for canucin A in CD<sub>3</sub>OH. The numbering scheme for canucin A is shown below the table.

| Residue |      | $\delta\text{H}^{\text{a}}$ | $\delta\text{C}^{\text{b}}$ | Residue            |      | $\delta\text{H}^{\text{a}}$ | $\delta\text{C}^{\text{b}}$ |
|---------|------|-----------------------------|-----------------------------|--------------------|------|-----------------------------|-----------------------------|
| Gly 1   | 1    | -                           | 169.9                       | Phe 9              | 1    | -                           | ND                          |
|         | 2    | 4.35, 3.66                  | 42.5                        |                    | 2    | 3.42                        | 58.1                        |
|         | NH   | 8.31                        | -                           |                    | 3    | 3.54, 3.11                  | 34.7                        |
| Val 2   | 1    | -                           | 171.4                       | 4                  | -    | 139.7                       |                             |
|         | 2    | 4.09                        | 56.7                        | 5, 9               | 7.44 | 129.5                       |                             |
|         | 3    | 2.07                        | 33.3                        | 6, 8               | 7.29 | 128.0                       |                             |
|         | 4    | 0.88                        | 18.3                        | 7                  | 7.20 | 126.0                       |                             |
|         | 5    | 0.90                        | 16.0                        | NH                 | 8.67 | -                           |                             |
|         | NH   | 7.96                        | -                           | Phe 10             | 1    | -                           | ND                          |
| Gly 3   | 1    | -                           | ND                          |                    | 2    | 3.84                        | 61.2                        |
|         | 2    | 4.60, 3.756                 | 42.3                        |                    | 3    | 3.70, 3.04                  | 35.4                        |
|         | NH   | 9.02                        | -                           |                    | 4    | -                           | 138.9                       |
| Phe 4   | 1    | -                           | 171.6                       | 5, 9               | 7.18 | 126.4                       |                             |
|         | 2    | 4.84                        | 55.3                        | 6, 8               | 7.25 | 128.2                       |                             |
|         | 3    | 3.39, 2.88                  | 35.2                        | 7                  | 7.33 | 126.5                       |                             |
|         | 4    | -                           | 137.3                       | NH                 | 7.80 | -                           |                             |
|         | 5, 9 | 7.37                        | 128.5                       | Ile 11             | 1    | -                           | 171.5                       |
|         | 6, 8 | 7.33                        | 128.3                       |                    | 2    | 4.31                        | 58.7                        |
|         | 7    | 7.25                        | 126.6                       |                    | 3    | 1.85                        | 37.1                        |
| NH      | 8.75 | -                           | 3'                          |                    | 0.93 | 15.0                        |                             |
| Pro 5   | 1    | -                           | ND                          |                    | 4    | 1.13, 0.70                  | 23.1                        |
|         | 2    | 3.46                        | 63.2                        | 5                  | 0.80 | 11.2                        |                             |
|         | 3    | 2.54, 1.91                  | 29.7                        | NH                 | 8.59 | -                           |                             |
|         | 4    | 2.03, 1.92                  | 24.9                        | His 12             | 1    | -                           | 172.1                       |
|         | 5    | 3.88, 3.50                  | 47.6                        |                    | 2    | 5.40                        | 50.8                        |
| Leu 6   | 1    | -                           | 173.0                       |                    | 3    | 2.92, 2.75                  | 27.6                        |
|         | 2    | 4.10                        | 57.7                        |                    | 4    | -                           | ND                          |
|         | 3    | 1.70, 1.82                  | 39.2                        | 5                  | 7.24 | 119.1                       |                             |
|         | 4    | 1.24                        | 25.4                        | 6                  | 8.67 | 133.3                       |                             |
|         | 5    | 0.44                        | 22.5                        | NH                 | 8.47 | -                           |                             |
|         | 6    | 0.90                        | 20.24                       | Phe 13             | 1    | -                           | ND                          |
|         | NH   | 8.02                        | -                           |                    | 2    | 4.74                        | 60.7                        |
| Ala 7   | 1    | -                           | 172.1                       |                    | 3    | 4.26, 3.56                  | 38.6                        |
|         | 2    | 4.51                        | 50.0                        |                    | 4    | -                           | 137.0                       |
|         | 3    | 1.34                        | 17.2                        | 5, 9               | 7.45 | 130.0                       |                             |
|         | NH   | 8.33                        | -                           | 6, 8               | 7.25 | 130.1                       |                             |
| Asp 8   | 1    | -                           | 172.8                       | 7                  | 7.17 | 126.4                       |                             |
|         | 2    | 4.56                        | 48.0                        | NH                 | 8.26 | -                           |                             |
|         | 3    | 2.32                        | 36.7                        | $\beta$ -OH-Asp 14 | 1    | -                           | ND                          |
|         | 4    | -                           | ND                          |                    | 2    | 4.73                        | 58.1                        |
|         | NH   | 7.35                        | -                           |                    | 3    | 4.35                        | 71.3                        |
|         |      |                             | 4                           |                    | -    | ND                          |                             |
|         |      |                             | NH                          | 8.00               | -    |                             |                             |

<sup>a</sup>800 MHz, <sup>b</sup>determined by edited HSQC and HMBC, ND: not detected.

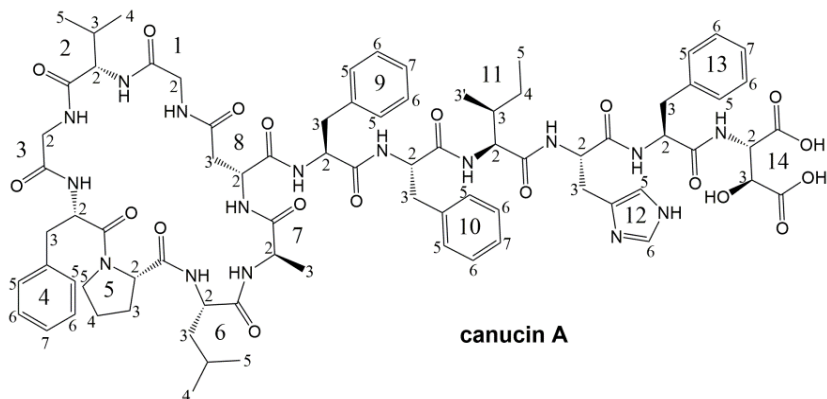

**Supplementary Table 3.** Summary of CYANA-derived parameters from calculations of *R* and *S* stereoisomers at the C $\beta$  of Asp14 in canucin A.<sup>a</sup>

| <b>Parameter</b>                                               | <b>R</b>      | <b>S</b>        |
|----------------------------------------------------------------|---------------|-----------------|
| # of distance constraints used for final structure calculation | 189           | 183             |
| average target function ( <i>f</i> )                           | 0.23 ± 0.00   | 0.17 ± 8.47E-05 |
| average backbone RMSD to mean                                  | 0.03 Å ± 0.01 | 0.01 Å ± 0.00   |
| average heavy atom RMSD to mean                                | 0.39 Å ± 0.04 | 0.46 Å ± 0.05   |
| # of violated distance constraints                             | 3             | 3               |
| # of violated van der Waals constraints                        | 0             | 0               |

<sup>a</sup>The mean and standard deviation are listed for the parameters indicated.

**Supplementary Table 4.** NMR assignments for canucin B in CD<sub>3</sub>OH. The numbering scheme for canucin B is shown below the table.

| Residue |      | $\delta H^a$ | $\delta C^b$ | Residue    |            | $\delta H^a$ | $\delta C^b$ |
|---------|------|--------------|--------------|------------|------------|--------------|--------------|
| Gly     | 1    | -            | 169.9        | Phe        | 1          | -            | ND           |
|         | 2    | 4.36, 3.66   | 42.5         |            | 2          | 3.42         | 58.1         |
| Val     | NH   | 8.44         | -            | 3          | 3.54, 3.11 | 34.8         |              |
|         | 1    | -            | 174.1        | 4          | -          | 139.8        |              |
|         | 2    | 4.09         | 56.7         | 5, 9       | 7.44       | 129.5        |              |
|         | 3    | 2.07         | 33.3         | 6, 8       | 7.29       | 128.1        |              |
|         | 4    | 0.93         | 16.1         | 7          | 7.20       | 126.0        |              |
|         | 5    | 0.90         | 18.3         | NH         | 8.66       | -            |              |
| Gly     | NH   | 8.02         | -            | Phe        | 1          | -            | ND           |
|         | 1    | -            | 171.5        |            | 2          | 3.82         | 61.3         |
|         | 2    | 4.57, 3.72   | 42.3         |            | 3          | 3.70, 3.03   | 35.4         |
| Phe     | NH   | 9.00         | -            | 4          | -          | 138.1        |              |
|         | 1    | -            | ND           | 5, 9       | 7.18       | 126.9        |              |
|         | 2    | 4.84         | 55.3         | 6, 8       | 7.25       | 128.1        |              |
|         | 3    | 3.37, 2.85   | 35.2         | 7          | 7.30       | 128.12       |              |
|         | 4    | -            | 137.3        | NH         | 7.82       | -            |              |
|         | 5, 9 | 7.35         | 128.4        | Ile        | 1          | -            | ND           |
|         | 6, 8 | 7.31         | 128.3        |            | 2          | 4.31         | 58.7         |
|         | 7    | 7.23         | 126.6        |            | 3          | 1.86         | 37.0         |
|         | NH   | 8.68         | -            |            | 3'         | 0.93         | 15.8         |
| 1       | -    | 171.5        | 4            |            | 1.11, 0.69 | 23.0         |              |
| Pro     | 2    | 3.50         | 63.2         | 5          | 0.79       | 11.2         |              |
|         | 3    | 2.54, 1.91   | 29.7         | NH         | 8.61       | -            |              |
|         | 4    | 2.02         | 24.9         | His        | 1          | -            | 175.3        |
|         | 5    | 3.88, 3.50   | 47.6         |            | 2          | 5.37         | 50.9         |
|         | Leu  | 1            | -            |            | 172.1      | 3            | 2.92, 2.76   |
| 2       |      | 4.13         | 57.7         |            | 4          | -            | ND           |
| 3       |      | 1.75, 1.87   | 39.6         |            | 5          | 7.15         | 119.8        |
| 4       |      | 1.28         | 25.4         | 6          | 8.53       | 133.3        |              |
| 5       |      | 0.50         | 22.6         | NH         | 8.49       | -            |              |
| 6       |      | 0.91         | 20.2         | Phe        | 1          | -            | 173.9        |
| NH      | 8.08 | -            | 2            |            | 4.76       | 60.5         |              |
| Ala     | 1    | -            | 172.0        |            | 3          | 4.27, 3.50   | 38.2         |
|         | 2    | 4.55         | 50.0         |            | 4          | -            | 136.9        |
|         | 3    | 1.33         | 17.1         |            | 5, 9       | 7.31         | 129.9        |
| Asp     | NH   | 8.38         | -            |            | 6, 8       | 7.23         | 130.0        |
|         | 1    | -            | ND           |            | 7          | 7.17         | 126.4        |
|         | 2    | 4.58         | 48.1         |            | NH         | 8.28         | -            |
|         | 3    | 2.31         | 36.7         |            | Asp        | 1            | -            |
|         | 4    | -            | ND           | 2          |            | 4.29         | 50.9         |
| NH      | 7.34 | -            | 3            | 2.94, 2.69 |            | 36.2         |              |
|         |      |              | 4            | -          |            | ND           |              |
|         |      |              | NH           | 8.04       |            | -            |              |

<sup>a</sup>800 MHz, <sup>b</sup>determined by edited HSQC and HMBC, ND: not detected.

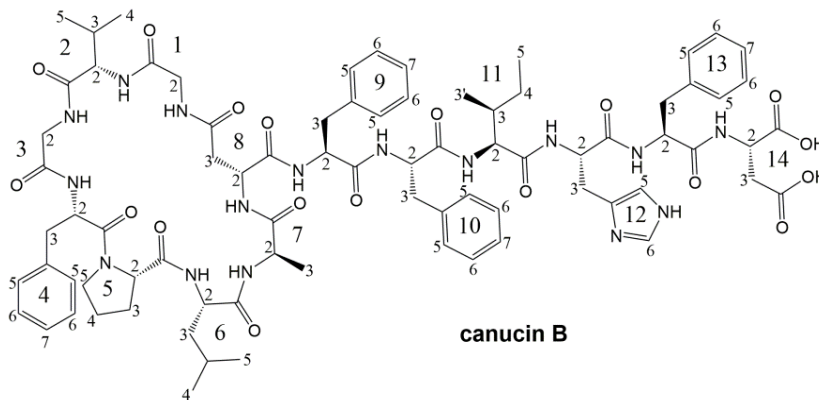

**Supplementary Table 5.** Annotation of the canucin biosynthetic gene cluster (*can*).<sup>a</sup>

| <b>Gene</b> | <b>Length (AA)</b> | <b>Homology-Based Predicted Function</b>  |
|-------------|--------------------|-------------------------------------------|
| <i>canA</i> | 40                 | leader/core peptide, putative Class II    |
| <i>canB</i> | 625                | asparagine synthetase                     |
| <i>canC</i> | 85                 | PqqD family protein                       |
| <i>canD</i> | 137                | transglutaminase-like superfamily protein |
| <i>canE</i> | 283                | TauD/TfdA family dioxygenase              |

<sup>a</sup>Gene name, the corresponding protein amino acid length, and a homology-predicted function are listed.

**Supplementary Table 6.** NMR assignments for keratinimicin A in DMSO-*d*<sub>6</sub>. The numbering scheme for keratinimicin A is shown below the table.

| C/H      | $\delta H^a$ | Multiplicity (Hz) | $\delta C^b$ | C/H               | $\delta H^a$ | Multiplicity (Hz) | $\delta C^b$ |
|----------|--------------|-------------------|--------------|-------------------|--------------|-------------------|--------------|
| NH       | 8.54         | UM                | -            | NH                | 7.42         | UM                | -            |
| COOH     | -            | -                 | 173.2        | COOH              | -            | -                 | 169.5        |
| $\alpha$ | 4.42         | d (6.1)           | 57.6         | $\alpha$          | 4.45         | q (9.8)           | 56.4         |
| 1        | -            | -                 | 137.7        | $\beta$           | 2.69, 2.55   | d (7.0, 9.7)      | 39.4         |
| 2        | 6.57         | s                 | 109.1        | 1                 | -            | -                 | 137.0        |
| 3        | -            | -                 | 157.7        | 2                 | 6.87         | d (7.5)           | 129.5        |
| 4        | 6.69         | s                 | 102.0        | 3                 | 6.91         | t (7.4)           | 128.5        |
| 5        | -            | -                 | 155.2        | 4                 | 7.03         | t (7.3)           | 126.8        |
| 6        | -            | -                 | 120.8        | NH                | ND           | -                 | -            |
| NH       | -            | -                 | -            | COOH              | -            | -                 | 174.3        |
| COOH     | -            | -                 | 173.2        | $\alpha$          | 4.41         | d (3.9)           | 59.0         |
| $\alpha$ | 4.48         | d (3.9)           | 54.2         | 1                 | -            | -                 | ND           |
| 1        | -            | -                 | ND           | 2                 | 7.44         | s                 | 129.3        |
| 2        | 7.18         | s                 | 136.2        | 3                 | -            | -                 | 119.2        |
| 3        | -            | -                 | 120.8        | 4                 | -            | -                 | 152.9        |
| 4        | -            | -                 | 155.8        | 5                 | 6.94         | d (8.0)           | 116.7        |
| 5        | 6.80         | UM                | 116.2        | 6                 | 7.21         | UM                | 127.8        |
| 6        | 6.80         | UM                | 126.2        | 1                 | 5.18         | UM                | 98.1         |
| NH       | 6.92         | -                 | -            | 2                 | 3.19         | t (4.1)           | 70.4         |
| COOH     | -            | -                 | 167.0        | 3                 | 3.22         | t (8.9)           | 70.7         |
| $\alpha$ | 4.23         | d (11.4)          | 61.5         | 4                 | 3.39         | t (9.2)           | 66.9         |
| $\beta$  | 5.11         | UM                | 74.8         | 5                 | 3.49         | UM                | 74.2         |
| 1        | -            | -                 | 138.8        | 6                 | 3.49, 3.45   | UM                | 61.2         |
| 2        | 7.89         | s                 | 129.3        | 1                 | 4.67         | UM                | 94.2         |
| 3        | -            | -                 | 127.5        | 2                 | 2.09, 1.48   | UM                | 37.2         |
| 4        | -            | -                 | 150.0        | 3                 | 3.23         | m                 | 47.2         |
| 5        | 7.32         | d (8.3)           | 124.2        | 3-NH <sub>2</sub> | ND           | -                 | -            |
| 6        | 7.36         | d (8.3)           | 127.8        | 4                 | 2.57         | t (9.6)           | 86.5         |
| NH       | 8.19         | UM                | -            | 4-OMe             | 3.33         | s                 | 58.          |
| COOH     | -            | -                 | 170.3        | 5                 | 3.64         | m                 | 67.3         |
| $\alpha$ | 5.62         | d (8.5)           | 54.6         | 6                 | 1.17         | d (5.7)           | 18.7         |
| 1        | -            | -                 | 133.7        | 1                 | 5.67         | d (7.4)           | 99.8         |
| 2        | 5.17         | s                 | 104.9        | 2                 | 3.62         | t (8.2)           | 77.1         |
| 3        | -            | -                 | 151.4        | 3                 | 3.46         | t (8.6)           | 78.2         |
| 4        | -            | -                 | 132.4        | 4                 | 3.22         | t (8.9)           | 70.8         |
| 5        | -            | -                 | 153.1        | 5                 | 3.29         | m (4.6,10.2)      | 78.1         |
| 6        | 5.65         | s                 | 108.4        | 6                 | 3.72         | d (10.2)          | 61.4         |
| NH       | ND           | -                 | -            | 1'                | 5.18         | UM                | 100.6        |
| COOH     | -            | -                 | 168.5        | 2'                | 3.71         | t (3.2)           | 71.1         |
| $\alpha$ | 4.52         | t (3.8)           | 59.7         | 3'                | 3.5          | t (10.2)          | 71.1         |
| $\beta$  | 5.2          | d (4.1)           | 71.5         | 4'                | 3.2          | t (10.2)          | 72.2         |
| 1        | -            | -                 | 137.6        | 5'                | 4.12         | m (6.2)           | 68.8         |
| 2        | 7.78         | d (8.3)           | 128.2        | 6'                | 1.08         | d (6.0)           | 18.5         |
| 3        | 7.22         | d (6.3)           | 122.9        |                   |              |                   |              |
| 4        | -            | -                 | 155.2        |                   |              |                   |              |
| 5        | 7.13         | d (8.4)           | 124.1        |                   |              |                   |              |
| 6        | 7.05         | d (8.4)           | 128.6        |                   |              |                   |              |

<sup>a</sup>800 MHz, <sup>b</sup>determined by edited HSQC and HMBC, UM: unresolved multiplicity, ND: not detected.

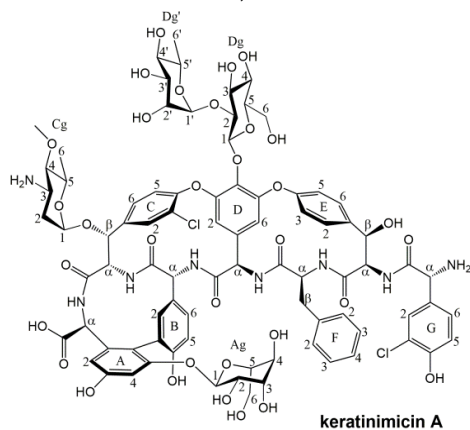

**Supplementary Table 7.** Annotation of the keratinimicin biosynthetic gene cluster (*ker*).

| <b>Gene</b> | <b>Length (AA)</b> | <b>Homology-Based Predicted Function</b> |
|-------------|--------------------|------------------------------------------|
| <i>vanH</i> | 291                | D-lactate dehydrogenase                  |
| <i>vanA</i> | 348                | D-alanine--(R)-lactate ligase            |
| <i>vanX</i> | 202                | D-Ala-D-Ala dipeptidase VanX             |
| <i>ajrR</i> | 340                | StrR-like transcriptional regulator      |
| <i>pdh</i>  | 303                | prephenate dehydrogenase                 |
| <i>tri</i>  | 644                | ABC transporter                          |
| <i>kerA</i> | 2082               | NRPS (A-T-C-A-T-E)                       |
| <i>kerB</i> | 1055               | NRPS (C-A-T)                             |
| <i>kerC</i> | 4059               | NRPS (C-A-T-E-C-A-T-E-C-A-T)             |
| <i>kerD</i> | 1864               | NRPS (C-A-T-X-TE)                        |
| <i>mbtH</i> | 69                 | MbtH protein                             |
| <i>oxyA</i> | 401                | cytochrome P450                          |
| <i>ker1</i> | 61                 | hypothetical protein                     |
| <i>oxyB</i> | 398                | cytochrome P450                          |
| <i>oxyC</i> | 406                | cytochrome P450                          |
| <i>khal</i> | 491                | Halogenase                               |
| <i>gtfA</i> | 363                | Glycosyltransferase                      |
| <i>gtfB</i> | 408                | Glycosyltransferase                      |
| <i>kerM</i> | 309                | O-methyltransferase                      |
| <i>gtfC</i> | 408                | Glycosyltransferase                      |
| <i>ker2</i> | 270                | PIG-L family deacetylase                 |
| <i>gtfD</i> | 623                | Mannosyltransferase                      |
| <i>hpgT</i> | 434                | Aminotransferase                         |
| <i>kph</i>  | 276                | $\alpha/\beta$ fold hydrolase            |
| <i>kerE</i> | 577                | AMP-dependent synthetase and ligase      |
| <i>oxyD</i> | 396                | cytochrome P450                          |
| <i>hmaS</i> | 350                | 4-hydroxyphenylpyruvate dioxygenase      |
| <i>hmo</i>  | 358                | 4-hydroxymandelate oxidase               |
| <i>ker3</i> | 448                | cation/H(+) antiporter                   |
| <i>kraA</i> | 476                | NDP-hexose 2,3-dehydratase               |
| <i>kraB</i> | 325                | NAD-dependent epimerase/dehydratase      |
| <i>kraC</i> | 369                | Aminotransferase                         |
| <i>kraD</i> | 205                | dTDP-4-keto-6-deoxy-D-glucose epimerase  |
| <i>dpgA</i> | 366                | type III polyketide synthase             |
| <i>dpgB</i> | 209                | enoyl-CoA hydratase                      |
| <i>dpgC</i> | 404                | enoyl-CoA hydratase                      |
| <i>dpgD</i> | 263                | enoyl-CoA hydratase                      |
| <i>dahp</i> | 358                | 3-deoxy-7-phosphoheptulonate synthase    |
| <i>ker4</i> | 188                | hypothetical protein                     |

<sup>a</sup>Gene name, the corresponding protein amino acid length, and a homology-predicted function are listed.

**Supplementary Table 8.** NMR assignments for keratinimicin B in DMSO-*d*<sub>6</sub>. The numbering scheme for keratinimicin B is shown below the table.

| C/H      | $\delta H^a$ | Multiplicity (Hz) | $\delta C^b$ | C/H               | $\delta H^a$       | Multiplicity (Hz) | $\delta C^b$ |
|----------|--------------|-------------------|--------------|-------------------|--------------------|-------------------|--------------|
| NH       | 8.57         | UM                | -            | NH                | 7.58               | d (8.6)           | -            |
| COOH     | -            | -                 | 173.1        | COOH              | -                  | -                 | 169.5        |
| $\alpha$ | 4.46         | d (4.7)           | 57.5         | $\alpha$          | 4.33               | q (8.0)           | 56.8         |
| 1        | -            | -                 | 136.9        | $\beta$           | 2.75, 2.56         | d (8.4, 7.8)      | 40.0         |
| 2        | 6.29         | s                 | 106.5        | 1                 | -                  | -                 | ND           |
| 3        | -            | -                 | 157.6        | 2                 | 6.83               | UM                | 129.6        |
| 4        | 6.42         | s                 | 102.8        | 3                 | 6.83               | UM                | 128.6        |
| 5        | -            | -                 | ND           | 4                 | 6.93               | t (6.8)           | 126.7        |
| 6        | -            | -                 | 118.6        | NH                | 7.52               | UM                | -            |
| NH       | 8.51         | UM                | -            | COOH              | -                  | -                 | 174.3        |
| COOH     | -            | -                 | 173.2        | $\alpha$          | 4.82               | UM                | 57.5         |
| $\alpha$ | 4.51         | d (3.4)           | 54.2         | 1                 | -                  | -                 | 131.2        |
| 1        | -            | -                 | ND           | 2                 | 7.52               | s                 | 129.4        |
| 2        | 7.23         | S                 | 136.7        | 3                 | -                  | -                 | 120.0        |
| 3        | -            | -                 | ND           | 4                 | -                  | -                 | 153.6        |
| 4        | -            | -                 | ND           | 5                 | 7.04               | d (9.0)           | 116.8        |
| 5        | 6.78         | UM                | 116.5        | 6                 | 7.34               | UM                | 128.2        |
| 6        | 6.77         | UM                | 125.9        | 1                 | 4.75               | UM                | 93.6         |
| NH       | 7.32         | d (8.6)           | -            | 2                 | 2.24, 1.76         | t (3.2)           | 34.4         |
| COOH     | -            | -                 | 166.9        | 3                 | 3.57               | m                 | 47.3         |
| $\alpha$ | 4.27         | t (9.0)           | 61.4         | 3-NH <sub>2</sub> | ND                 | -                 | -            |
| $\beta$  | 5.1          | U.S.              | 75.2         | 4                 | 2.98               | t (7.4)           | 82.5         |
| 1        | -            | -                 | 138.8        | 4-OMe             | 3.35               | s                 | 58.6         |
| 2        | 7.91         | s                 | 129.5        | 5                 | 3.67               | m                 | 67.3         |
| 3        | -            | -                 | 127.5        | 6                 | 1.19               | d (5.4)           | 18.5         |
| 4        | -            | -                 | 149.8        | 1                 | 5.67               | d (7.4)           | 100.0        |
| 5        | 7.32         | d (8.6)           | 124.2        | 2                 | 3.61               | t (7.9)           | 77.2         |
| 6        | 7.34         | UM                | 128.2        | 3                 | 3.51               | t (6.1)           | 77.9         |
| NH       | 8.06         | d (7.5)           | -            | 4                 | 3.25               | t (9.0)           | 70.6         |
| COOH     | -            | -                 | 170.3        | 5                 | 3.31               | m                 | 78.2         |
| $\alpha$ | 5.62         | d (8.4)           | 54.8         | 6                 | 3.72               | d (10.8)          | 61.4         |
| 1        | -            | -                 | 133.7        | 1'                | 5.41               | UM                | 95.7         |
| 2        | 5.15         | s                 | 104.9        | 2'                | 2.19, 1.76         | d (3.6)           | 34.2         |
| 3        | -            | -                 | 151.4        | 3'                | 3.21               | UM                | 50.0         |
| 4        | -            | -                 | 132.2        | Dg'               | 3'-NH <sub>2</sub> | ND                | -            |
| 5        | -            | -                 | 153.3        | 4'                | 3.16               | t (9.2)           | 72.9         |
| 6        | 5.67         | s                 | 108.7        | 5'                | 4.28               | M                 | 68.4         |
| NH       | ND           | -                 | -            | 6'                | 1.14               | d (6.0)           | 18.3         |
| COOH     | -            | -                 | 168.5        |                   |                    |                   |              |
| $\alpha$ | 4.73         | t (3.4)           | 59.8         |                   |                    |                   |              |
| $\beta$  | 5.09         | UM                | 72.0         |                   |                    |                   |              |
| 1        | -            | -                 | 137.7        |                   |                    |                   |              |
| 2        | 7.79         | d (8.2)           | 128.4        |                   |                    |                   |              |
| 3        | 7.21         | UM                | 123.1        |                   |                    |                   |              |
| 4        | -            | -                 | 155.1        |                   |                    |                   |              |
| 5        | 7.11         | d (7.8)           | 124.1        |                   |                    |                   |              |
| 6        | 7.02         | d (8.8)           | 128.8        |                   |                    |                   |              |

<sup>a</sup>800 MHz, <sup>b</sup>determined by edited HSQC and HMBC, UM: unresolved multiplicity, ND: not detected.

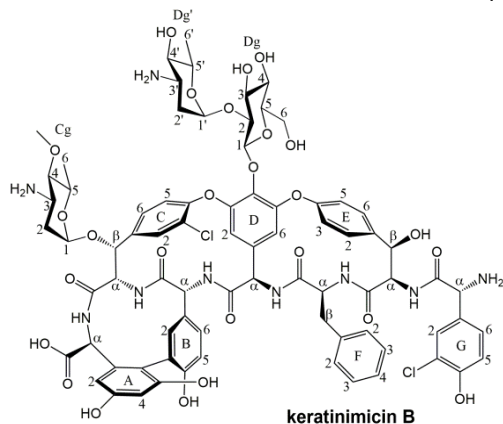



**Supplementary Table 9.** NMR assignments for keratinimicin C in DMSO-*d*<sub>6</sub>. The numbering scheme for keratinimicin C is shown below the table.

| C/H      | $\delta$ H <sup>a</sup> | Multiplicity (Hz) | $\delta$ C <sup>b</sup> | C/H               | $\delta$ H <sup>a</sup> | Multiplicity (Hz) | $\delta$ C <sup>b</sup> |
|----------|-------------------------|-------------------|-------------------------|-------------------|-------------------------|-------------------|-------------------------|
| NH       | 8.47                    | UM                | -                       | NH                | 7.3                     | -                 | -                       |
| COOH     | -                       | -                 | 173.3                   | COOH              | -                       | -                 | 169.5                   |
| $\alpha$ | 4.42                    | d (6.1)           | 57.6                    | $\alpha$          | 4.5                     | q (9.2)           | 55.5                    |
| 1        | -                       | -                 | 137.7                   | $\beta$           | 2.61, 2.57              | d (6.9, 7.0)      | 40.0                    |
| 2        | 6.53                    | s                 | 109.0                   | 1                 | -                       | -                 | 136.3                   |
| 3        | -                       | -                 | 157.6                   | 2                 | 6.79                    | d (7.7)           | 129.1                   |
| 4        | 6.66                    | s                 | 102.7                   | 3                 | 6.86                    | t (7.3)           | 128.3                   |
| 5        | -                       | -                 | 155.1                   | 4                 | 6.99                    | t (7.2)           | 126.4                   |
| 6        | -                       | -                 | 121.2                   | COOH              | -                       | -                 | 172.0                   |
| NH       | 8.5                     | UM                | -                       | CO                | -                       | -                 | 183.2                   |
| COOH     | -                       | -                 | 174.5                   | 1                 | -                       | -                 | 124.5                   |
| $\alpha$ | 4.45                    | UM                | 54.1                    | 2                 | 7.98                    | s                 | 131.9                   |
| 1        | -                       | -                 | ND                      | 3                 | -                       | -                 | 115.6                   |
| 2        | 7.22                    | s                 | 136.2                   | 4                 | -                       | -                 | 152.9                   |
| 3        | -                       | -                 | 121.5                   | 5                 | 6.34                    | d (6.6)           | 119.6                   |
| 4        | -                       | -                 | 155.8                   | 6                 | 7.69                    | d (8.5)           | 132.9                   |
| 5        | 6.82                    | d (8.2)           | 115.9                   | 1                 | 5.15                    | UM                | 98.0                    |
| 6        | 6.8                     | UM                | 125.8                   | 2                 | 3.11                    | UM                | 70.0                    |
| NH       | 7.19                    | UM                | -                       | 3                 | 3.16                    | t (8.2)           | 70.6                    |
| COOH     | -                       | -                 | 167.2                   | 4                 | 3.36                    | t (9.4)           | 66.9                    |
| $\alpha$ | 4.23                    | t (7.5)           | 61.23                   | 5                 | 3.49                    | t (7.7)           | 74.1                    |
| $\beta$  | 5.07                    | UM                | 74.8                    | 6                 | 3.45, 3.49              | UM                | 61.2                    |
| 1        | -                       | -                 | 138.7                   | 1                 | 4.72                    | UM                | 93.4                    |
| 2        | 7.86                    | s                 | 129.1                   | 2                 | 2.16, 1.63              | UM                | 35.0                    |
| 3        | -                       | -                 | 127.7                   | 3                 | 3.5                     | t (8.8)           | 46.9                    |
| 4        | -                       | -                 | 149.9                   | 3-NH <sub>2</sub> | ND                      | -                 | -                       |
| 5        | 7.3                     | d (7.8)           | 123.9                   | 4                 | 2.78                    | UM                | 83.5                    |
| 6        | 7.32                    | d (10.5)          | 127.3                   | 4-OMe             | 3.33                    | s                 | 58.1                    |
| NH       | 7.79                    | d (7.6)           | -                       | 5                 | 3.67                    | UM                | 67.0                    |
| COOH     | -                       | -                 | 170.5                   | 6                 | 1.18                    | d (5.7)           | 18.3                    |
| $\alpha$ | 5.61                    | d (9.4)           | 54.1                    | 1                 | 5.63                    | d (7.5)           | 99.6                    |
| 1        | -                       | -                 | 133.5                   | 2                 | 3.59                    | t (8.2)           | 77.3                    |
| 2        | 5.1                     | s                 | 104.3                   | 3                 | 3.48                    | t (7.7)           | 77.5                    |
| 3        | -                       | -                 | 151.6                   | 4                 | 3.21                    | t (8.7)           | 70.4                    |
| 4        | -                       | -                 | 132.2                   | 5                 | 3.31                    | UM                | 77.8                    |
| 5        | -                       | -                 | 153.2                   | 6                 | 3.72, 3.45              | d (10.5)          | 61.3                    |
| 6        | 5.58                    | s                 | 108.1                   | 1'                | 5.39                    | UM                | 95.5                    |
| NH       | 7.62                    | d (7.9)           | -                       | 2'                | 2.14, 1.67              | UM                | 34.3                    |
| COOH     | -                       | -                 | 167.8                   | 3'                | 3.16                    | m (8.2)           | 49.5                    |
| $\alpha$ | 4.77                    | t (3.8)           | 59.3                    | Dg'               | 3'-NH <sub>2</sub>      | ND                | -                       |
| $\beta$  | 5.24                    | d (2.6)           | 71.2                    | 4'                | 3.06                    | UM                | 73.1                    |
| 1        | -                       | -                 | 137.3                   | 5'                | 4.23                    | UM                | 68.4                    |
| 2        | 7.62                    | d (7.9)           | 128.1                   | 6'                | 1.08                    | d (6.0)           | 18.5                    |
| 3        | 7.2                     | d (7.8)           | 122.7                   |                   |                         |                   |                         |
| 4        | -                       | -                 | 155.2                   |                   |                         |                   |                         |
| 5        | 7.13                    | d (7.9)           | 123.9                   |                   |                         |                   |                         |
| 6        | 7.07                    | d (8.1)           | 128.4                   |                   |                         |                   |                         |

<sup>a</sup>800 MHz, <sup>b</sup>determined by edited HSQC and HMBC, UM: unresolved multiplicity, ND: not detected.

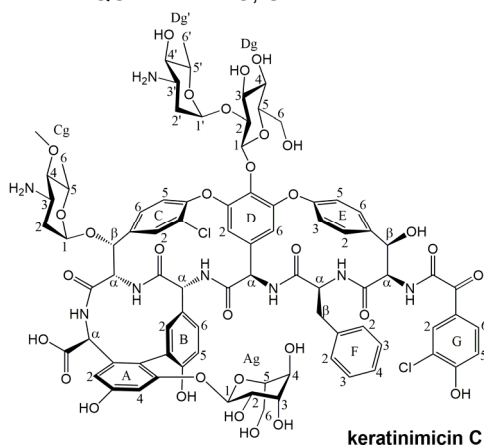

**Supplementary Table 10.** NMR assignments for keratinimicin D in DMSO-*d*<sub>6</sub>. The numbering scheme for keratinimicin D is shown below the table.

|          | C/H      | $\delta H^a$ | Multiplicity (Hz) | $\delta C^b$ |                   | C/H        | $\delta H^a$ | Multiplicity (Hz) | $\delta C^b$ |      |
|----------|----------|--------------|-------------------|--------------|-------------------|------------|--------------|-------------------|--------------|------|
| A        | NH       | 8.32         | UM                | -            | F                 | NH         | ND           | -                 | -            |      |
|          | COOH     | -            | -                 | ND           |                   | COOH       | -            | -                 | ND           |      |
|          | $\alpha$ | 4.43         | d (5.1)           | 57.3         |                   | $\alpha$   | 4.5          | q (8.2)           | 55.8         |      |
|          | 1        | -            | -                 | -            |                   | $\beta$    | 2.59         | d (6.3)           | 40.3         |      |
|          | 2        | 6.48         | s                 | 108.6        |                   | 1          | -            | -                 | ND           |      |
|          | 3        | -            | -                 | -            |                   | 2          | 6.78         | d (7.6)           | 129.3        |      |
|          | 4        | 6.69         | s                 | 103.2        |                   | 3          | 6.84         | t (7.5)           | 128.5        |      |
|          | 5        | -            | -                 | ND           |                   | 4          | 6.98         | t (7.4)           | 126.6        |      |
|          | 6        | -            | -                 | ND           |                   | COOH       | -            | -                 | ND           |      |
|          | NH       | 8.55         | UM                | -            |                   | CO         | -            | -                 | ND           |      |
| B        | COOH     | -            | -                 | ND           | G                 | 1          | -            | -                 | ND           |      |
|          | $\alpha$ | 4.44         | UM                | 54.3         |                   | 2          | 7.96         | s                 | 131.4        |      |
|          | 1        | -            | -                 | -            |                   | 3          | -            | -                 | ND           |      |
|          | 2        | 7.23         | s                 | 136.2        |                   | 4          | -            | -                 | ND           |      |
|          | 3        | -            | -                 | ND           |                   | 5          | 6.3          | d (6.3)           | 119.8        |      |
|          | 4        | -            | -                 | ND           |                   | 6          | 7.67         | d (8.6)           | 128.3        |      |
|          | 5        | 6.83         | d (7.5)           | 116.2        |                   | 1          | 5.16         | UM                | 98.3         |      |
|          | 6        | 6.81         | d (8.8)           | 126.2        |                   | 2          | 3.12         | UM                | 70.2         |      |
|          | NH       | ND           | -                 | -            |                   | Ag         | 3            | 3.2               | t (8.7)      | 70.8 |
|          | COOH     | -            | -                 | ND           |                   |            | 4            | 3.37              | UM           | 67.1 |
| $\alpha$ | 4.25     | d (11.5)     | 61.5              | 5            | 3.48              |            | t (7.7)      | 74.3              |              |      |
| $\beta$  | 5.07     | UM           | 74.4              | 6            | 3.47              |            | UM           | 61.4              |              |      |
| 1        | -        | -            | ND                | 1            | 4.73              |            | UM           | 93.7              |              |      |
| 2        | 7.86     | s            | 129.3             | 2            | 2.16, 1.61        |            | UM           | 35.3              |              |      |
| 3        | -        | -            | ND                | 3            | 3.49              |            | UM           | 47.3              |              |      |
| 4        | -        | -            | ND                | Cg           | 3-NH <sub>2</sub> |            | ND           | -                 | -            |      |
| 5        | 7.28     | d (8.3)      | 124.1             |              | 4                 |            | 2.55         | UM                | 86.7         |      |
| 6        | 7.32     | d (8.4)      | 127.5             |              | 4-OMe             |            | 3.34         | s                 | 58.5         |      |
| NH       | ND       | -            | -                 |              | 5                 | 3.65       | m            | 67.3              |              |      |
| COOH     | -        | -            | ND                |              | 6                 | 1.19       | d (5.6)      | 18.5              |              |      |
| $\alpha$ | 5.59     | d (9.0)      | 54.3              |              | 1                 | 5.63       | d (7.4)      | 99.8              |              |      |
| 1        | -        | -            | ND                |              | 2                 | 3.59       | t (8.3)      | 77.6              |              |      |
| 2        | 5.09     | s            | 104.4             |              | Dg                | 3          | 3.45         | UM                | 77.8         |      |
| 3        | -        | -            | ND                |              |                   | 4          | 3.15         | d (9.1)           | 70.9         |      |
| 4        | -        | -            | ND                |              |                   | 5          | 3.31         | m                 | 78.1         |      |
| 5        | -        | -            | ND                | 6            |                   | 3.73, 3.44 | UM           | 61.5              |              |      |
| 6        | 5.55     | s            | 108.3             | 1'           |                   | 5.13       | UM           | 100.8             |              |      |
| NH       | 7.83     | d (8.5)      | -                 | 2'           |                   | 3.72       | UM           | 71.0              |              |      |
| COOH     | -        | -            | ND                | Dg'          |                   | 3'         | 3.48         | UM                | 71.1         |      |
| $\alpha$ | 4.77     | dd (8.4,4.6) | 59.6              |              |                   | 4'         | 3.21         | t (9.4)           | 72.4         |      |
| $\beta$  | 5.23     | d (3.3)      | 71.4              |              |                   | 5'         | 4.08         | m                 | 68.8         |      |
| 1        | -        | -            | ND                |              |                   | 6'         | 1.08         | d (6.1)           | 18.4         |      |
| 2        | 7.61     | d (8.5)      | 128.3             |              |                   |            |              |                   |              |      |
| 3        | 7.21     | dd (7.8,1.6) | 123.0             |              |                   |            |              |                   |              |      |
| 4        | -        | -            | ND                |              |                   |            |              |                   |              |      |
| 5        | 7.13     | dd (7.8,1.7) | 124.1             |              |                   |            |              |                   |              |      |
| 6        | 7.06     | d (8.3)      | 128.7             |              |                   |            |              |                   |              |      |

<sup>a</sup>800 MHz, <sup>b</sup>determined by edited HSQC and HMBC, UM: unresolved multiplicity, ND: not detected.

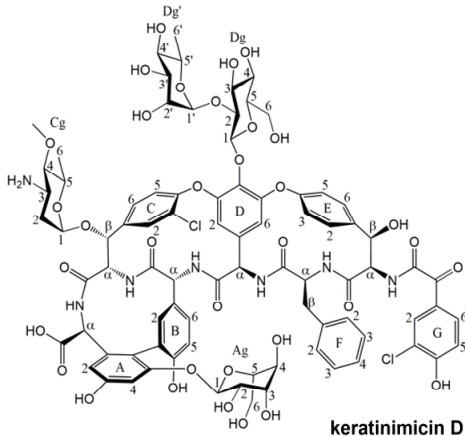

**Supplementary Table 11.** NMR assignments for keratinicyclin A in DMSO-*d*<sub>6</sub>. The numbering scheme for keratinicyclin A is shown below the table.

| C/H      | $\delta$ H <sup>a</sup> | Multiplicity (Hz) | $\delta$ C <sup>b</sup> | C/H               | $\delta$ H <sup>a</sup> | Multiplicity (Hz) | $\delta$ C <sup>b</sup> |
|----------|-------------------------|-------------------|-------------------------|-------------------|-------------------------|-------------------|-------------------------|
| NH       | 8.7                     | d (4.4)           | -                       | NH                | 8.16                    | UM                | -                       |
| COOH     | -                       | -                 | 173.2                   | COOH              | -                       | -                 | 166.5                   |
| $\alpha$ | 4.49                    | d (5.8)           | 57.3                    | $\alpha$          | 4.74                    | UM                | 62.8                    |
| 1        | -                       | -                 | 137.3                   | $\beta$           | 5.93                    | d (8.4)           | 77.1                    |
| 2        | 6.52                    | s                 | 108.9                   | 1                 | -                       | -                 | 137.6                   |
| 3        | -                       | -                 | 158.0                   | E 2               | 7.29                    | d (8.5)           | 127.5                   |
| 4        | 6.71                    | s                 | 102.7                   | 3                 | 7.00                    | d (8.8)           | 123.5                   |
| 5        | -                       | -                 | 155.6                   | 4                 | -                       | -                 | 158.7                   |
| 6        | -                       | -                 | 121.5                   | 5                 | 7.22                    | d (8.0)           | 122.0                   |
| NH       | 8.65                    | d (3.5)           | -                       | 6                 | 7.12                    | d (8.1)           | 128.8                   |
| COOH     | -                       | -                 | ND                      | NHCO              | -                       | -                 | 160.1                   |
| $\alpha$ | 4.59                    | d (3.9)           | 54.2                    | NH                | 7.84                    | d (9.2)           | -                       |
| 1        | -                       | -                 | 132.8                   | COOH              | -                       | -                 | 169.5                   |
| 2        | 7.23                    | s                 | 136.4                   | $\alpha$          | 4.34                    | q (7.8, 9.2)      | 57.6                    |
| 3        | -                       | -                 | 119.2                   | $\beta$           | 2.75, 2.58              | d (10.7)          | 39.9                    |
| 4        | -                       | -                 | 156.0                   | 1                 | -                       | -                 | 137.0                   |
| 5        | 6.84                    | d (8.1)           | 116.2                   | 2                 | 6.85                    | d (7.4)           | 129.9                   |
| 6        | 6.82                    | UM                | 126.3                   | 3                 | 6.8                     | t (7.4)           | 128.5                   |
| NH       | 7.2                     | -                 | -                       | 4                 | 6.97                    | t (7.2)           | 127.1                   |
| COOH     | -                       | -                 | 167.7                   | 1                 | 5.2                     | UM                | 98.3                    |
| $\alpha$ | 4.29                    | d (11.3)          | 61.6                    | 2                 | 3.18                    | t (3.1)           | 70.4                    |
| $\beta$  | 5.11                    | UM                | 75.2                    | 3                 | 3.24                    | t (3.6, 9.7)      | 71.0                    |
| 1        | -                       | -                 | 138.8                   | 4                 | 3.39                    | t (9.7)           | 67.1                    |
| 2        | 7.89                    | s                 | 129.5                   | 5                 | 3.48                    | UM                | 74.4                    |
| 3        | -                       | -                 | 127.5                   | 6                 | 3.49, 3.45              | d (7.5)           | 61.2                    |
| 4        | -                       | -                 | 150.0                   | 1                 | 4.76                    | t (4.0)           | 93.9                    |
| 5        | 7.26                    | d (8.2)           | 124.0                   | 2                 | 2.17, 1.65              | UM                | 35.2                    |
| 6        | 7.35                    | d (8.0)           | 128.1                   | 3                 | 3.52                    | m (8.3)           | 47.3                    |
| NH       | 8.13                    | d (8.5)           | -                       | 3-NH <sub>2</sub> | ND                      | -                 | -                       |
| COOH     | -                       | -                 | 170.2                   | 4                 | 2.8                     | t (9.9)           | 83.7                    |
| $\alpha$ | 5.56                    | d (8.6)           | 54.1                    | 4-OMe             | 3.35                    | s                 | 58.6                    |
| 1        | -                       | -                 | 133.7                   | 5                 | 3.68                    | m (6.0)           | 67.3                    |
| 2        | 5.11                    | s                 | 105.0                   | 6                 | 1.2                     | d (5.5)           | 18.8                    |
| 3        | -                       | -                 | 151.4                   | 1                 | 5.63                    | d (7.5)           | 99.5                    |
| 4        | -                       | -                 | 132.4                   | 2                 | 3.59                    | t (8.4)           | 77.7                    |
| 5        | -                       | -                 | 153.1                   | 3                 | 3.41                    | t (9.0)           | 78.1                    |
| 6        | 5.51                    | s                 | 112.6                   | 4                 | 3.14                    | t (9.0)           | 71.1                    |
|          |                         |                   |                         | 5                 | 3.22                    | m (8.7)           | 78.7                    |
|          |                         |                   |                         | 6                 | 3.72, 3.37              | d (9.4, 6.2)      | 62.0                    |
|          |                         |                   |                         | 1'                | 5.13                    | UM                | 101.2                   |
|          |                         |                   |                         | 2'                | 3.71                    | t (3.3)           | 71.0                    |
|          |                         |                   |                         | 3'                | 3.49                    | t (9.2)           | 71.4                    |
|          |                         |                   |                         | 4'                | 3.2                     | t (9.4)           | 72.5                    |

<sup>a</sup>800 MHz, <sup>b</sup>determined by edited HSQC and HMBC, UM: unresolved multiplicity, ND: not detected.

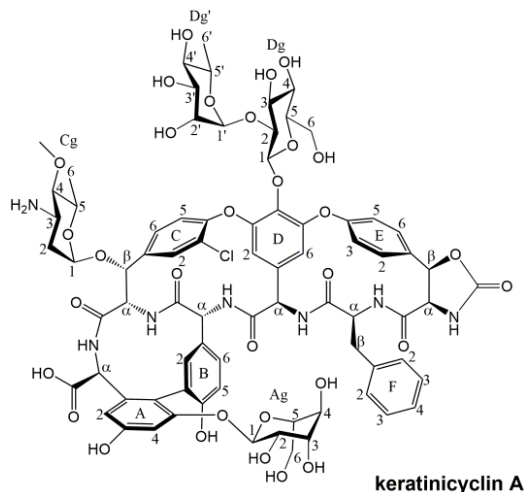

**Supplementary Table 12.** NMR assignments for keratinicyclin B in DMSO-*d*<sub>6</sub>. The numbering scheme for keratinicyclin B is shown below the table.

| C/H      | $\delta H^a$ | Multiplicity (Hz) | $\delta C^b$ | C/H                  | $\delta H^a$ | Multiplicity (Hz) | $\delta C^b$ |
|----------|--------------|-------------------|--------------|----------------------|--------------|-------------------|--------------|
| NH       | 8.67         | d (4.8)           | -            | NH                   | 8.19         | UM                | -            |
| COOH     | -            | -                 | 173.2        | COOH                 | -            | -                 | ND           |
| $\alpha$ | 4.49         | d (5.8)           | 57.5         | $\alpha$             | 4.75         | UM                | 62.6         |
| 1        | -            | -                 | -            | $\beta$              | 5.93         | d (8.4)           | 76.8         |
| A 2      | 6.29         | s                 | 106.5        | 1                    | -            | -                 | ND           |
| 3        | -            | -                 | ND           | E 2                  | 7.3          | dd (1.5,9.1)      | 127.5        |
| 4        | 6.42         | s                 | 102.7        | 3                    | 7.00         | dd (1.6,9.1)      | 123.3        |
| 5        | -            | -                 | ND           | 4                    | -            | -                 | ND           |
| 6        | -            | -                 | ND           | 5                    | 7.22         | d (7.1)           | 121.8        |
| NH       | 8.64         | d (3.2)           | -            | 6                    | 7.14         | dd (1.4,7.4)      | 128.6        |
| COOH     | -            | -                 | ND           | NHCO                 | -            | -                 | ND           |
| $\alpha$ | 4.59         | d (3.4)           | 54.0         | NH                   | 7.85         | d (9.1)           | -            |
| 1        | -            | -                 | ND           | COOH                 | -            | -                 | ND           |
| B 2      | 7.23         | s                 | 136.3        | $\alpha$             | 4.35         | q (8.7)           | 57.3         |
| 3        | -            | -                 | ND           | F $\beta$            | 2.76, 2.6    | t (10.3),d (7.1)  | 39.7         |
| 4        | -            | -                 | ND           | 1                    | -            | -                 | ND           |
| 5        | 6.84         | d (8.9)           | 116.2        | 2                    | 6.86         | d (7.7)           | 129.6        |
| 6        | 6.82         | dd (2.8,9.0)      | 126.2        | 3                    | 6.8          | t (7.3)           | 128.5        |
| NH       | ND           | -                 | -            | 4                    | 6.98         | t (7.2)           | 126.9        |
| COOH     | -            | -                 | 167.4        | 1                    | 5.19         | UM                | 98.4         |
| $\alpha$ | 4.29         | d (10.6)          | 61.6         | 2                    | 3.18         | t (3.0)           | 70.2         |
| $\beta$  | 5.13         | UM                | 75.0         | 3                    | 3.25         | t (9.0)           | 70.8         |
| 1        | -            | -                 | ND           | Ag 4                 | 3.4          | t (9.3)           | 67.0         |
| C 2      | 7.9          | s                 | 129.3        | 5                    | 3.5          | m                 | 74.2         |
| 3        | -            | -                 | ND           | 6                    | 3.48,3.46    | UM                | 61.1         |
| 4        | -            | -                 | ND           | 1                    | 4.75         | UM                | 93.6         |
| 5        | 7.28         | d (8.2)           | 124.1        | 2                    | 2.19, 1.66   | UM                | 35.0         |
| 6        | 7.35         | d (7.4)           | 127.9        | 3                    | 3.53         | m                 | 47.1         |
| NH       | 8.13         | d (8.6)           | -            | Cg 3-NH <sub>2</sub> | ND           | -                 | -            |
| COOH     | -            | -                 | ND           | 4                    | 2.83         | t (9.6)           | 83.4         |
| $\alpha$ | 5.57         | d (8.6)           | 54.0         | 4-OMe                | 3.34         | s                 | 58.4         |
| 1        | -            | -                 | ND           | 5                    | 3.69         | m                 | 67.3         |
| D 2      | 5.13         | s                 | 104.8        | 6                    | 1.2          | d (5.3)           | 18.6         |
| 3        | -            | -                 | ND           | 1                    | 5.64         | d (7.4)           | 99.3         |
| 4        | -            | -                 | ND           | 2                    | 3.59         | t (8.4)           | 77.4         |
| 5        | -            | -                 | ND           | 3                    | 3.43         | t (9.4)           | 77.8         |
| 6        | 5.53         | s                 | 112.4        | Dg' 4                | 3.16         | t (9.0)           | 70.7         |
|          |              |                   |              | 5                    | 3.23         | m                 | 78.4         |
|          |              |                   |              | 6                    | 3.72, 3.39   | d (10.8)          | 61.6         |
|          |              |                   |              | 1'                   | 5.37         | UM                | 95.8         |
|          |              |                   |              | 2'                   | 2.14, 1.69   | UM                | 34.6         |
|          |              |                   |              | Dg' 3'               | 3.2          | m                 | 49.8         |
|          |              |                   |              | 3'-NH <sub>2</sub>   | ND           | -                 | -            |
|          |              |                   |              | 4'                   | 3.06         | t (8.4)           | 73.2         |

<sup>a</sup>800 MHz, <sup>b</sup>determined by edited HSQC and HMBC, UM: unresolved multiplicity, ND: not detected.

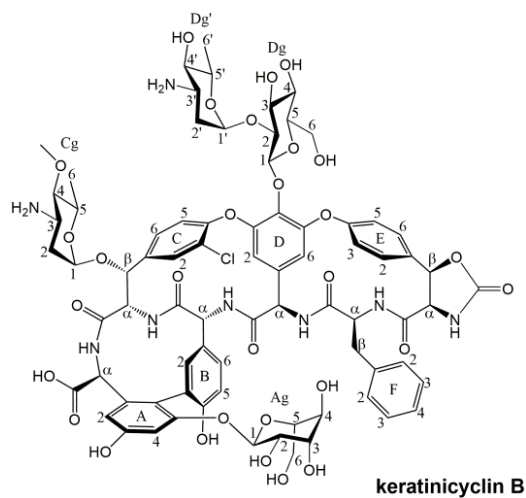

**Supplementary Table 13.** NMR assignments for keratinicyclin C in DMSO-*d*<sub>6</sub>. The numbering scheme for keratinicyclin C is shown below the table.

| C/H      | $\delta H^a$ | Multiplicity (Hz) | $\delta C^b$ | C/H        | $\delta H^a$ | Multiplicity (Hz) | $\delta C^b$ |
|----------|--------------|-------------------|--------------|------------|--------------|-------------------|--------------|
| NH       | 8.52         | UM                | -            | NH         | 8.14         | UM                | -            |
| COOH     | -            | -                 | 173.3        | COOH       | -            | -                 | 166.2        |
| $\alpha$ | 4.44         | d (5.8)           | 57.7         | $\alpha$   | 4.75         | d (9.0)           | 62.6         |
| 1        | -            | -                 | 137.3        | $\beta$    | 5.93         | d (8.2)           | 76.8         |
| A 2      | 6.34         | s                 | 106.6        | 1          | -            | -                 | 132.4        |
| 3        | -            | -                 | 157.5        | E 2        | 7.31         | dd (2.1,8.5)      | 127.5        |
| 4        | 6.39         | s                 | 102.7        | 3          | 7.02         | d (3.1,9.0)       | 123.4        |
| 5        | -            | -                 | ND           | 4          | -            | -                 | 158.7        |
| 6        | -            | -                 | 118.6        | 5          | 7.22         | dd (2.3)          | 121.8        |
| NH       | 8.75         | d (3.4)           | -            | 6          | 7.12         | dd (1.7,8.2)      | 128.6        |
| COOH     | -            | -                 | ND           | NHCO       | -            | -                 | 159.7        |
| $\alpha$ | 4.58         | d (4.3)           | 54.1         | NH         | 7.84         | d (9.8)           | -            |
| 1        | -            | -                 | 126.4        | COOH       | -            | -                 | 169.5        |
| B 2      | 7.27         | s                 | 136.6        | $\alpha$   | 4.31         | q (7.8, 9.2)      | 57.6         |
| 3        | -            | -                 | 122.4        | F $\beta$  | 2.76, 2.60   | d (10.6)          | 39.9         |
| 4        | -            | -                 | 155.9        | 1          | -            | -                 | 137.0        |
| 5        | 6.76         | d (8.6)           | 116.5        | 2          | 6.88         | d (7.5)           | 129.6        |
| 6        | 6.82         | dd (1.8,8.6)      | 125.7        | 3          | 6.94         | t (7.6)           | 128.5        |
| NH       | 6.91         | -                 | -            | 4          | 7.02         | t (7.4)           | 126.7        |
| COOH     | -            | -                 | ND           | 1          | 4.69         | UM                | 94.0         |
| $\alpha$ | 4.32         | t (8.7)           | 61.5         | 2          | 2.12, 1.54   | UM                | 36.7         |
| $\beta$  | 5.13         | UM                | 74.8         | 3          | 3.31         | dd (10.2)         | 47.3         |
| 1        | -            | -                 | 138.8        | Cg 3-NH2   | ND           | -                 | -            |
| 2        | 7.93         | s                 | 129.4        | 4          | 2.65         | t (9.7)           | 85.7         |
| 3        | -            | -                 | 127.5        | 4-OMe      | 3.34         | s                 | 58.3         |
| 4        | -            | -                 | 149.9        | 5          | 3.65         | UM                | 67.8         |
| 5        | 7.26         | d (8.6)           | 124.1        | 6          | 1.18         | d (5.8)           | 18.7         |
| 6        | 7.38         | dd (1.7,8.0)      | 127.9        | 1          | 5.65         | d (7.6)           | 99.2         |
| NH       | 8.24         | d (8.7)           | -            | 2          | 3.59         | t (8.1)           | 77.5         |
| COOH     | -            | -                 | 170.0        | 3          | 3.43         | UM                | 78.0         |
| $\alpha$ | 5.64         | d (8.9)           | 54.2         | Dg 4       | 3.15         | t (9.5)           | 70.8         |
| 1        | -            | -                 | 134.5        | 5          | 3.23         | m (6.0)           | 78.5         |
| D 2      | 5.17         | s                 | 104.8        | 6          | 3.73, 3.38   | d (10.3)          | 61.9         |
| 3        | -            | -                 | ND           | 1'         | 5.35         | UM                | 96.1         |
| 4        | -            | -                 | 133.1        | 2'         | 2.1, 1.6     | UM                | 35.4         |
| 5        | -            | -                 | ND           | 3'         | 3.11         | UM                | 49.8         |
| 6        | 5.52         | s                 | 112.4        | Dg' 3'-NH2 | ND           | -                 | -            |
|          |              |                   |              | 4'         | 2.94         | t (10.1)          | 74.5         |
|          |              |                   |              | 5'         | 4.17         | m (6.4,8.8)       | 68.5         |

<sup>a</sup>800 MHz, <sup>b</sup>determined by edited HSQC and HMBC, UM: unresolved multiplicity, ND: not detected.

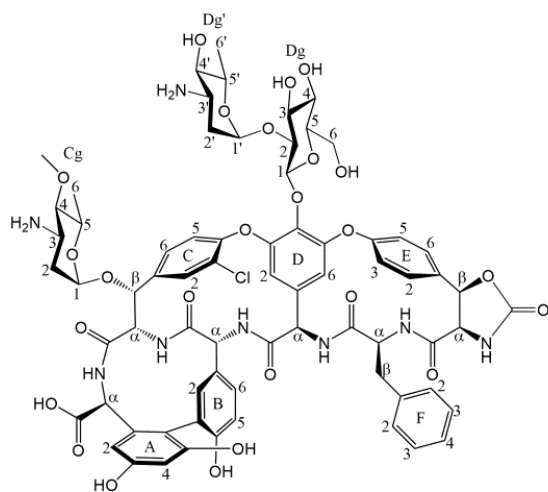

**keratinicyclin C**

**Supplementary Table 14.** MIC values (in  $\mu\text{M}$ ) for keratinimicins and keratinicyclin B against select pathogenic Gram-negative bacteria and viruses.

| Strain                  | Keratinimicin A | Keratinimicin C | Keratinicyclin B | Control drug <sup>a</sup> |
|-------------------------|-----------------|-----------------|------------------|---------------------------|
| <b><u>Bacterium</u></b> |                 |                 |                  |                           |
| <i>E. coli</i>          | >35             | >35             | >39              | >44 (V), 0.1 (C)          |
| <i>K. pneumoniae</i>    | >35             | >35             | >39              | >44 (V), 0.1 (C)          |
| <i>E. cloacae</i>       | >35             | >35             | >39              | >44 (V), 0.1 (C)          |
| <i>P. aeruginosa</i>    | >35             | >35             | >39              | >44 (V), 3.0 (C)          |
| <i>A. baumannii</i>     | >35             | >35             | >39              | >44 (V), 3.0 (C)          |
| <i>V. cholerae</i>      | >35             | >35             | >39              | >44 (V), 0.8 (C)          |
| <i>B. fragilis</i>      | >35             | >35             | >39              | 11.7 (M)                  |
| <b><u>Virus</u></b>     |                 |                 |                  |                           |
| <i>Influenza B</i>      | – <sup>b</sup>  | –               | >92              | 6.1 (O)                   |
| <i>HSV-1</i>            | –               | –               | >92              | 97 (A)                    |
| <i>HSV-2</i>            | –               | –               | >92              | 32 (A)                    |
| <i>Vaccinia</i>         | –               | –               | >92              | –                         |
| <i>Rhinovirus</i>       | –               | –               | >92              | 204 (R)                   |

<sup>a</sup>Control drugs are abbreviated as follows: V, vancomycin; C, ciprofloxacin, M, metronidazole; O, oseltamivir; A, acyclovir; R, ribavirin.

<sup>b</sup>Not determined.

**Supplementary Fig. 1.** Direct LAESI-IMS output from a well containing orfamide. For each strain, 502 such spectra were compiled (one per elicitor), the observed signals extracted using GMSU-LAESI software, which gave all  $m/z$  values and the corresponding intensities per well, and the three-dimensional dataset (elicitor vs.  $m/z$  vs. intensity) then plotted in MatLab (see Supplementary Methods for details).

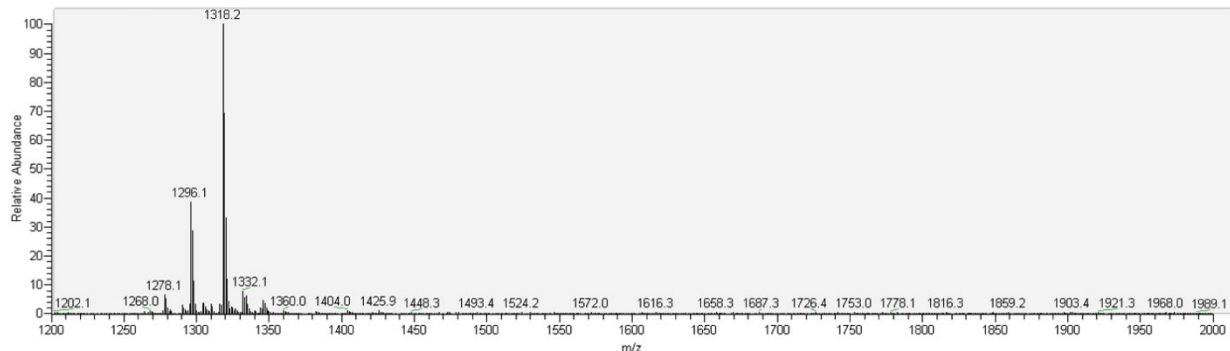

**Supplementary Fig. 2.** Secondary metabolome of *S. canus*, as detected by LAESI-MS in response to 502 elicitors in the  $m/z$  range of 250-1200. b. thr. designates below threshold of detection. The HiTES-IMS screen was carried out in a single replicate.

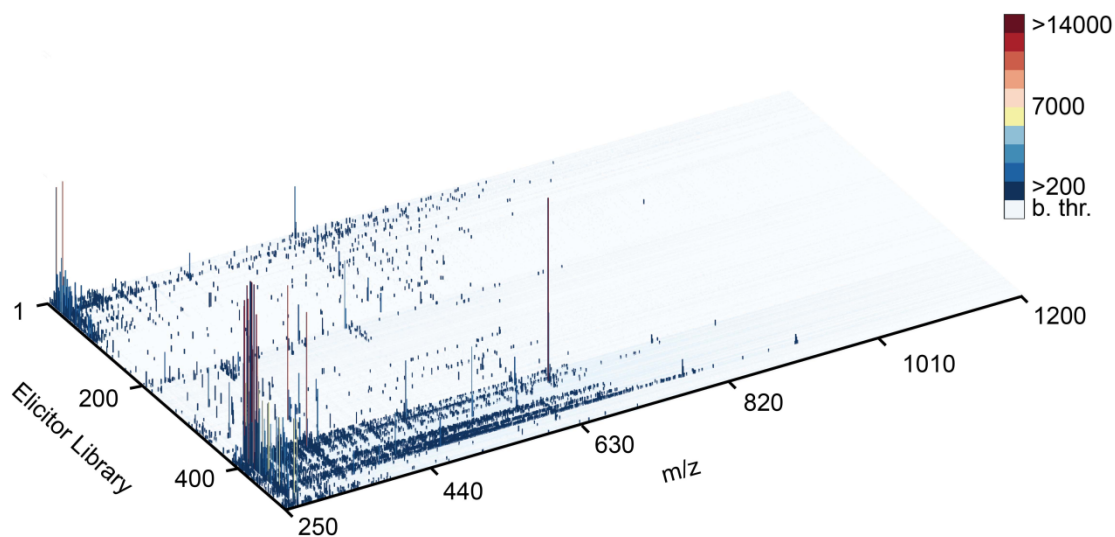

**Supplementary Fig. 3.** NMR spectra of canucin A in CD<sub>3</sub>OH. Full 1D/2D NMR datasets on canucins were collected once.

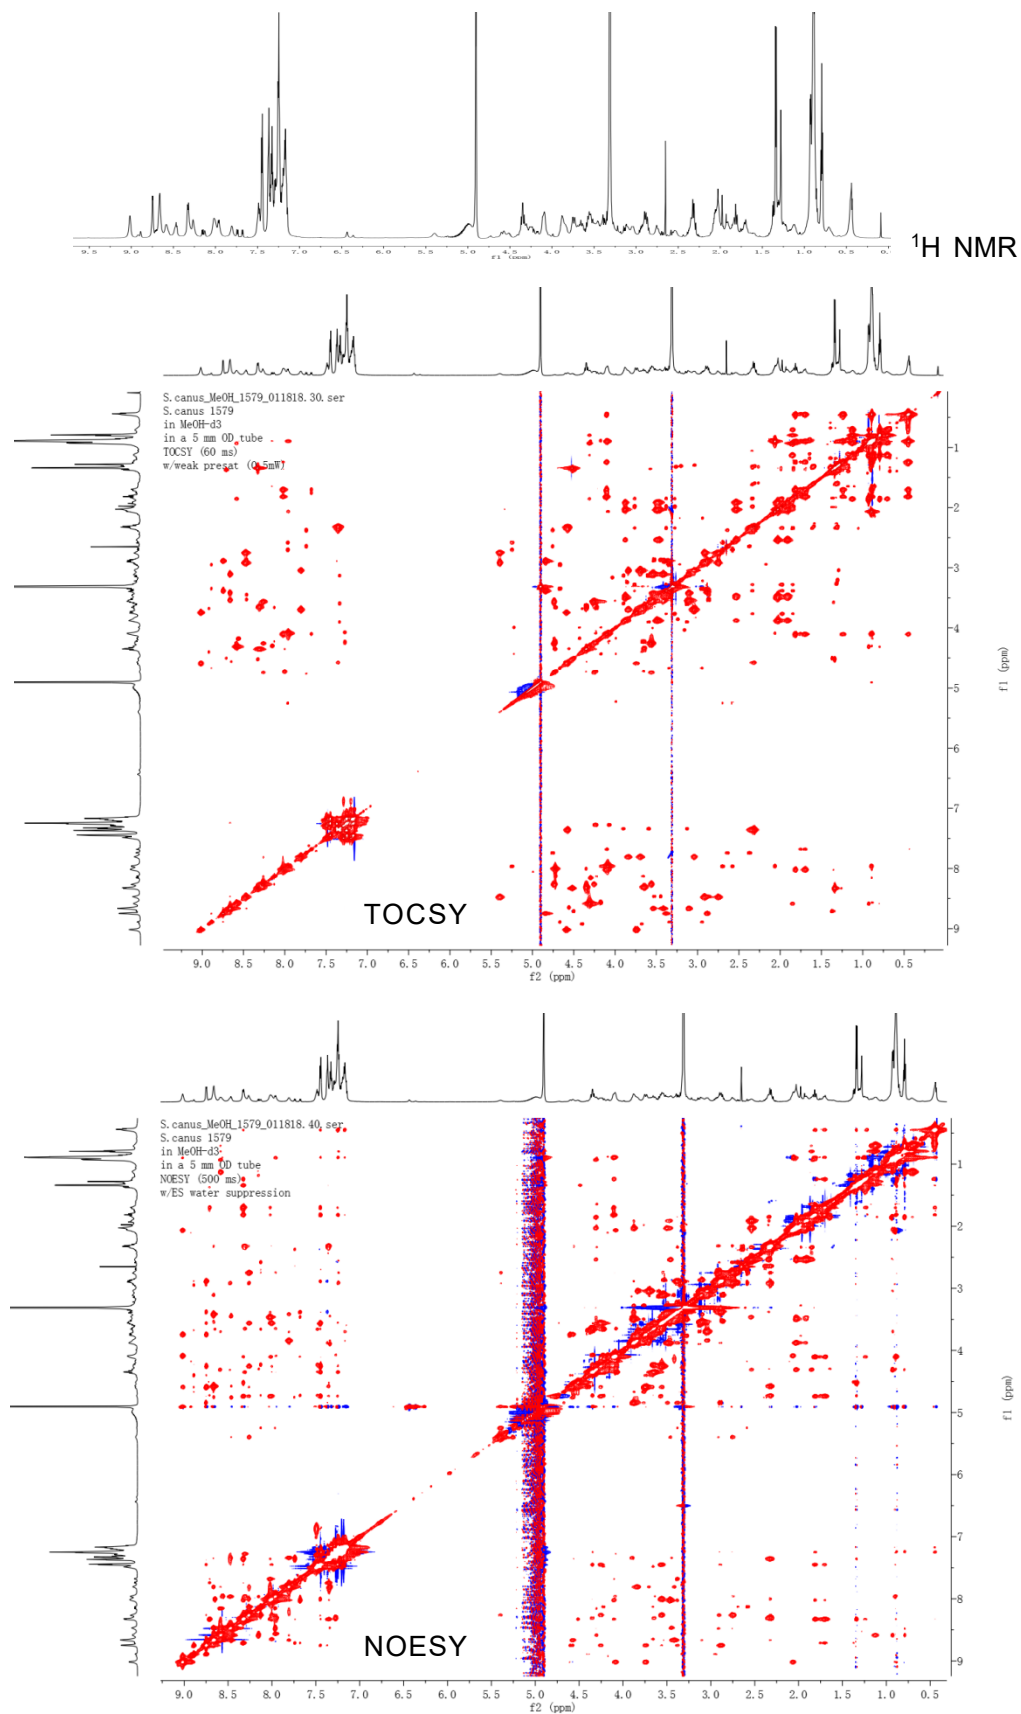



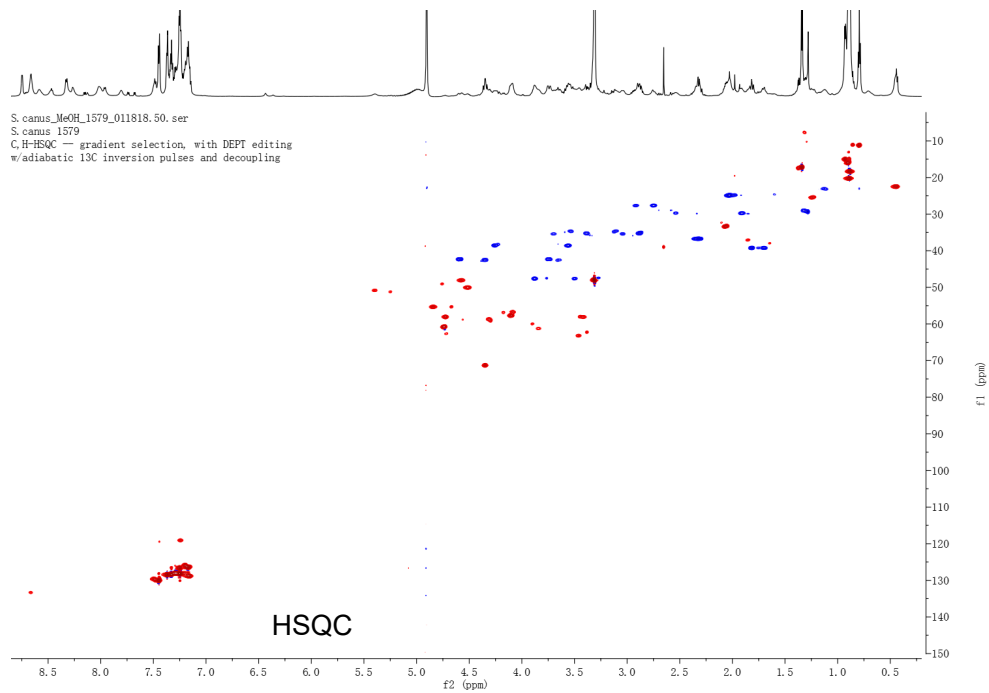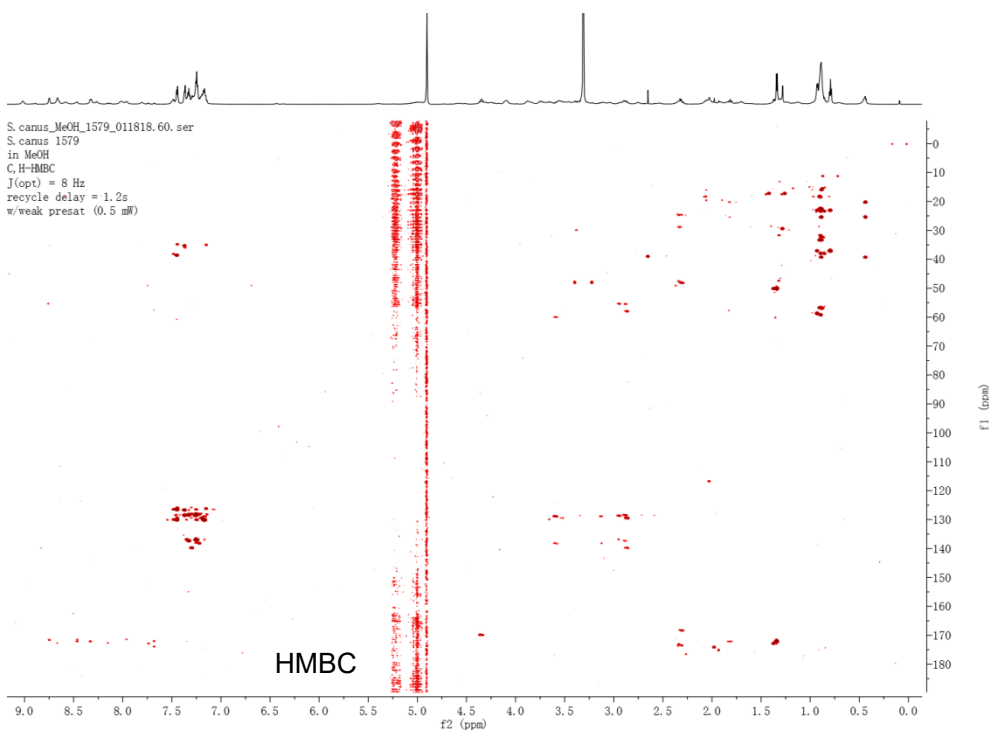

**Supplementary Fig. 4.** Secondary metabolome of *A. keratiniphila* as detected by LAESI-MS in response to 502 elicitors. (Top) Shown is the  $m/z$  range 250-1600; b. thr. designates below threshold of detection. Note that a lower threshold was used for signals in the range of  $m/z$  1100-1500 (as described in Supplementary Methods) to highlight production of two cryptic metabolites with  $m/z$  1286 and 1425). 2D components of the 3D plot focusing on  $m/z$  1286 (middle) and 1425 (bottom) are also shown along with the best elicitors. The HiTES-IMS screen was carried out in a single replicate.

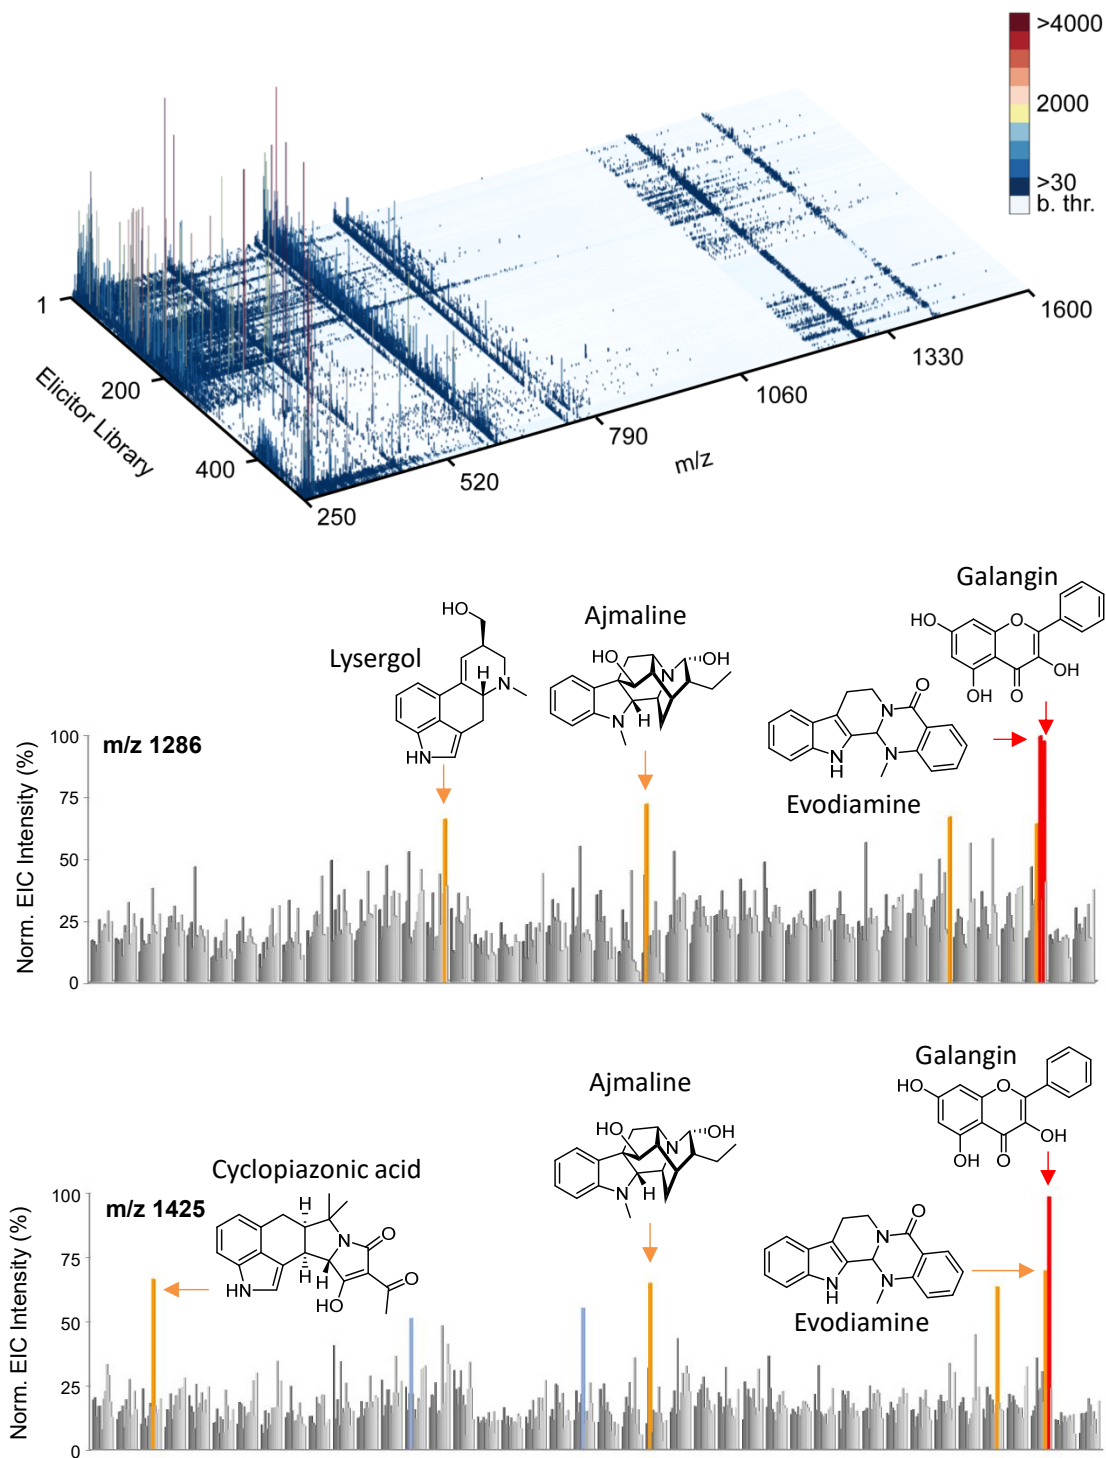

**Supplementary Fig. 5.** NMR spectra of keratinimicin A in DMSO-*d*<sub>6</sub>. Full 1D/2D NMR datasets on keratinimicins were collected once.

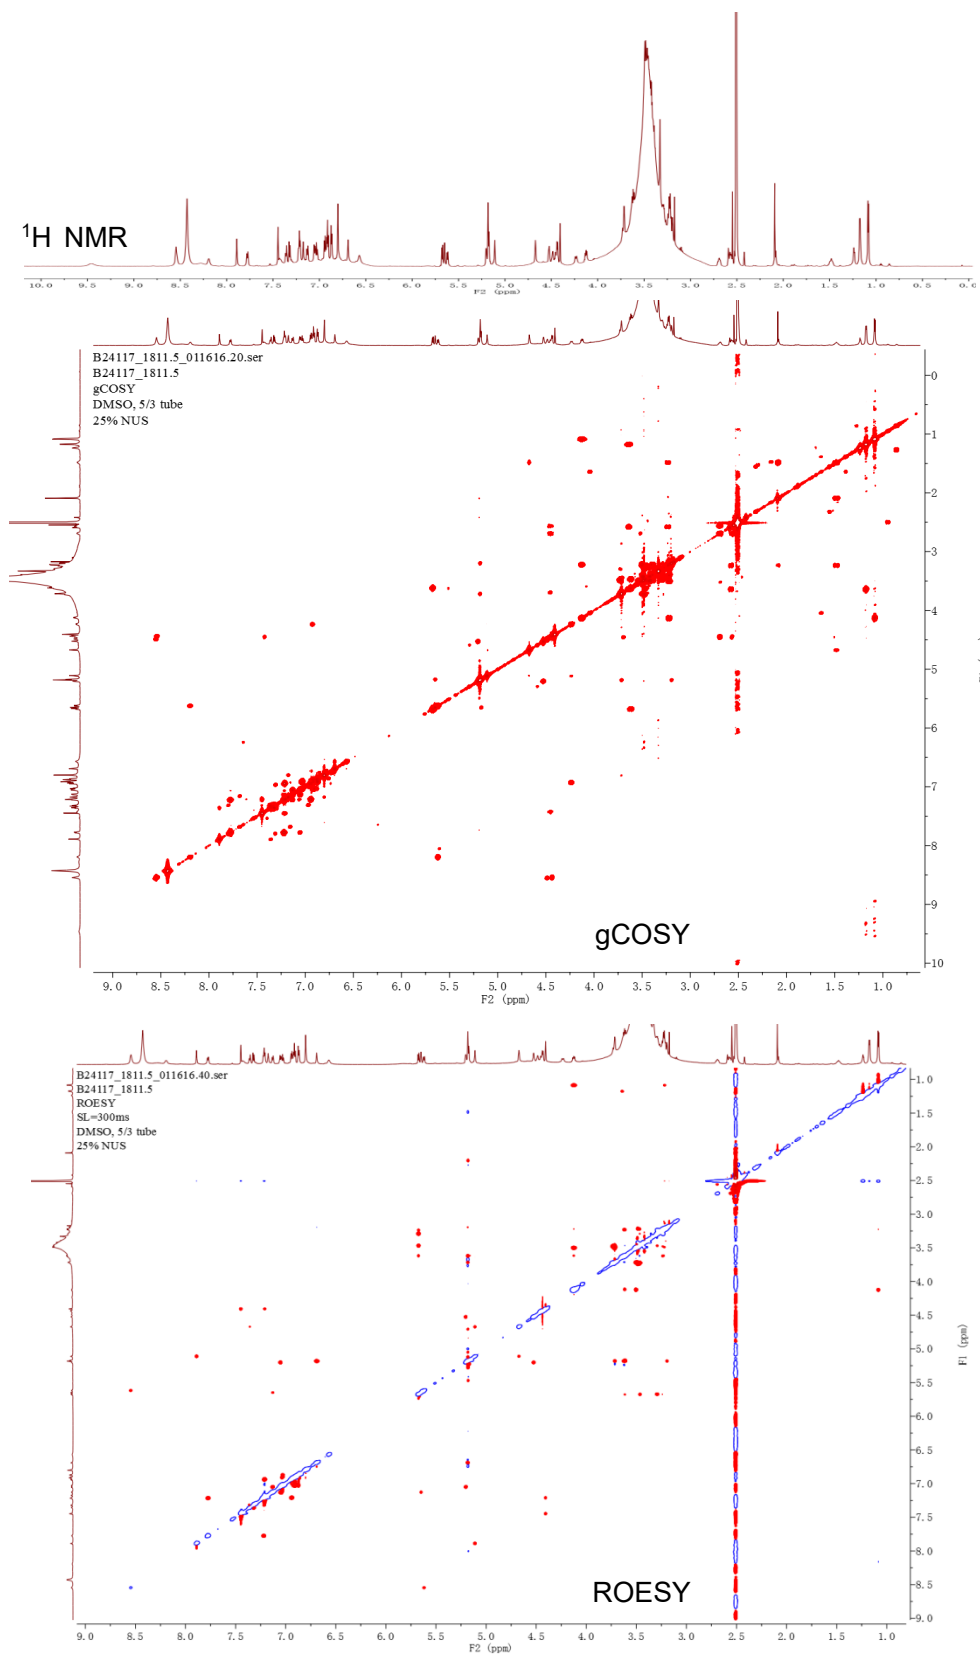

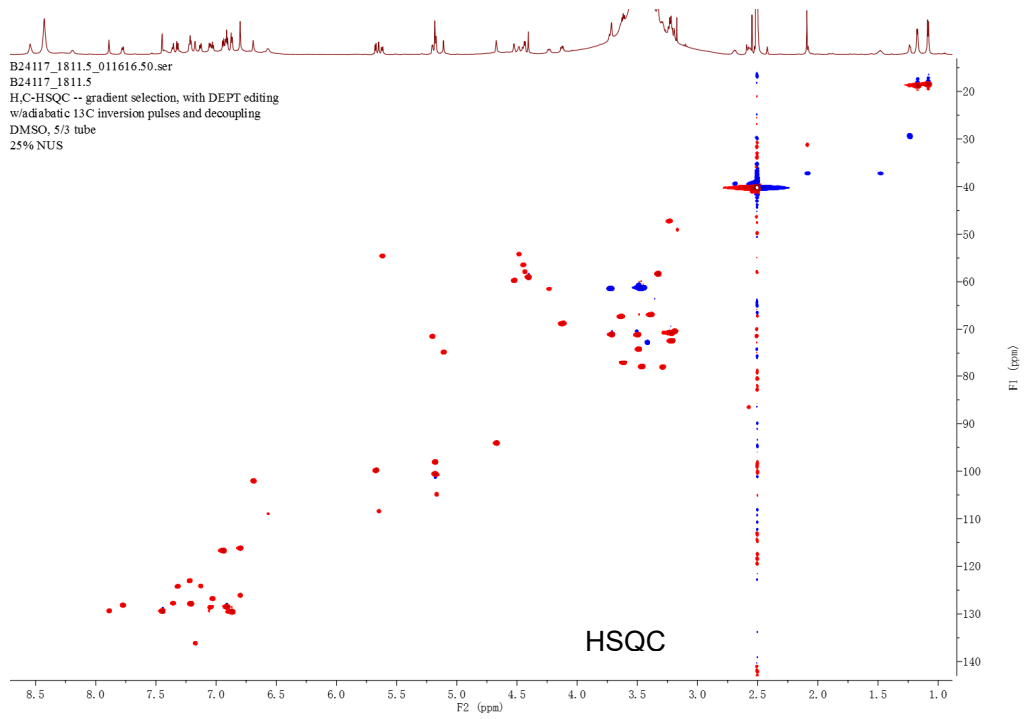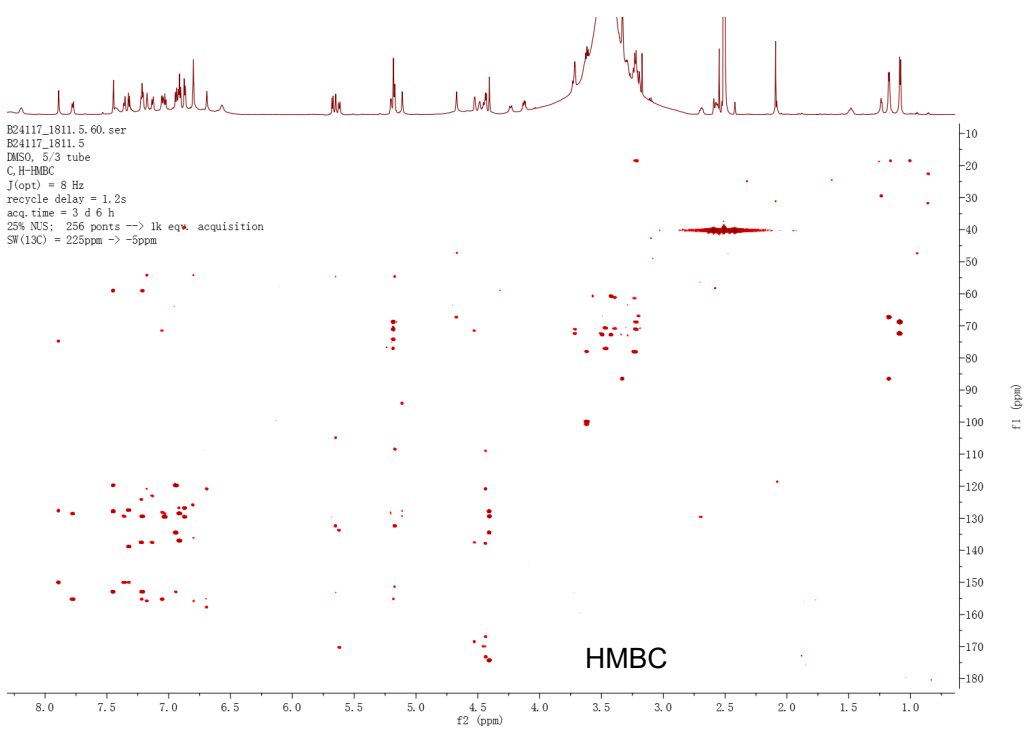

**Supplementary Fig. 6.** NMR spectra of keratinicyclin A in DMSO-*d*<sub>6</sub>. Full 1D/2D NMR datasets on keratinicyclins were collected once.

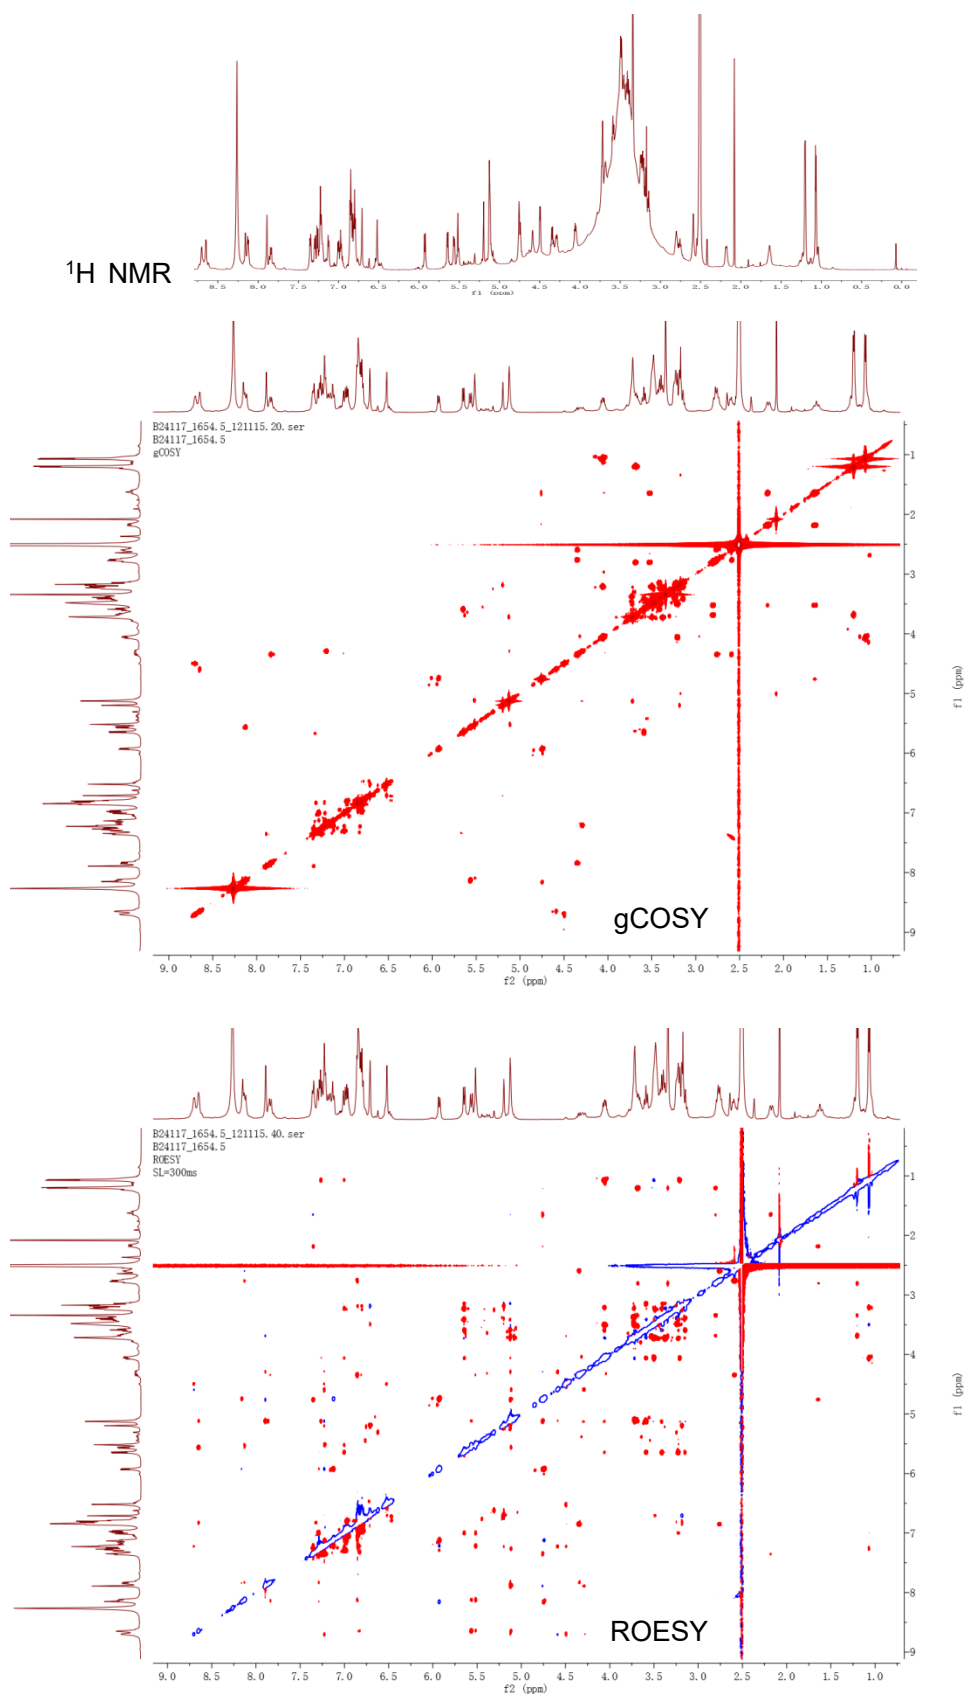

# <sup>13</sup>C NMR

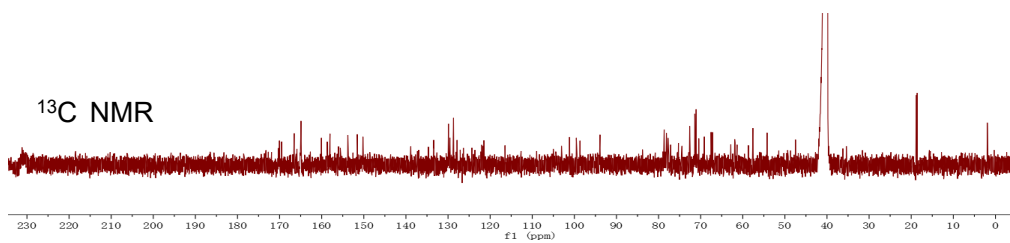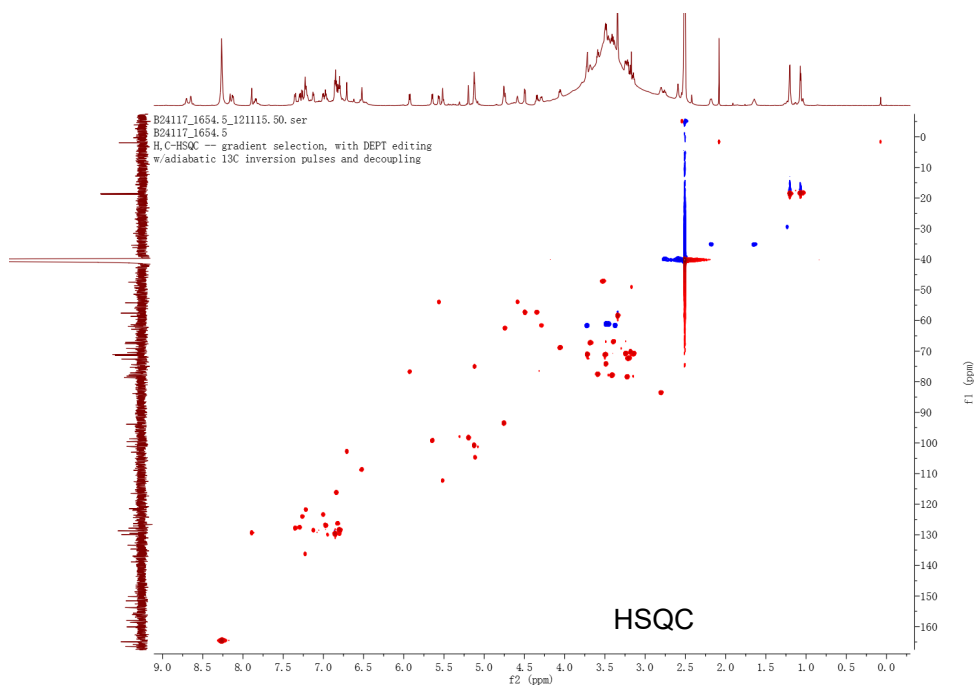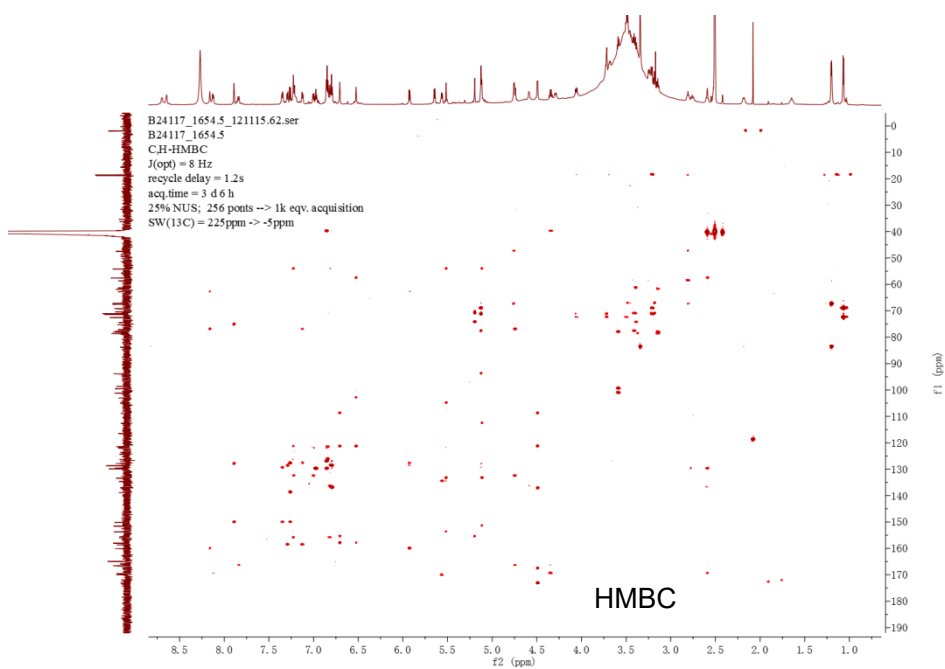

Supplement: NIHMS1512142-supplement-2.pdf [file NIHMS1512142-supplement-2.pdf]
