# Supplementary material
Source: PubMed Central journal article supplement (PMC6339573)
Supplement: NIHMS1512142-supplement-1.pdf [file NIHMS1512142-supplement-1.pdf]

## Reporting Summary

Nature Research wishes to improve the reproducibility of the work that we publish. This form provides structure for consistency and transparency in reporting. For further information on Nature Research policies, see [Authors & Referees](#) and the [Editorial Policy Checklist](#).

### Statistical parameters

When statistical analyses are reported, confirm that the following items are present in the relevant location (e.g. figure legend, table legend, main text, or Methods section).

n/a Confirmed

- The exact sample size ( $n$ ) for each experimental group/condition, given as a discrete number and unit of measurement
- An indication of whether measurements were taken from distinct samples or whether the same sample was measured repeatedly
- The statistical test(s) used AND whether they are one- or two-sided  
*Only common tests should be described solely by name; describe more complex techniques in the Methods section.*
- A description of all covariates tested
- A description of any assumptions or corrections, such as tests of normality and adjustment for multiple comparisons
- A full description of the statistics including central tendency (e.g. means) or other basic estimates (e.g. regression coefficient) AND variation (e.g. standard deviation) or associated estimates of uncertainty (e.g. confidence intervals)
- For null hypothesis testing, the test statistic (e.g.  $F$ ,  $t$ ,  $r$ ) with confidence intervals, effect sizes, degrees of freedom and  $P$  value noted  
*Give  $P$  values as exact values whenever suitable.*
- For Bayesian analysis, information on the choice of priors and Markov chain Monte Carlo settings
- For hierarchical and complex designs, identification of the appropriate level for tests and full reporting of outcomes
- Estimates of effect sizes (e.g. Cohen's  $d$ , Pearson's  $r$ ), indicating how they were calculated
- Clearly defined error bars  
*State explicitly what error bars represent (e.g. SD, SE, CI)*

Our web collection on [statistics for biologists](#) may be useful.

### Software and code

Policy information about [availability of computer code](#)

#### Data collection

Agilent OpenLAB CDS Chemstation C.01.04  
Agilent MassHunter workstation Data Acquisition  
BioTek Synergy/H1 microplate reader Gen5 2.08  
CyBio Composer-CyBi-Well Studio  
Bruker\_Biospin TopSpin V3.2.5  
Thermo Tune Plus 2.7.0.1103 SP1  
LDS LAESI Desktop Software 2.5.0.7

#### Data analysis

AntiBase 2013  
Agilent OpenLAB CDS Data Analysis A.01.01  
Agilent MassHunter Qualitative Analysis B.06.00  
Microsoft Office Professional 2016  
Mestrelab Research MestReNova 12.0.1  
PerkinElmer ChemDraw Professional 17.0  
GraphPad Prism 5  
Adobe Illustrator CC 2018  
NCBI ([www.ncbi.nlm.nih.gov](http://www.ncbi.nlm.nih.gov))  
JGI IMG ([img.jgi.doe.gov/cgi-bin/w/main.cgi](http://img.jgi.doe.gov/cgi-bin/w/main.cgi))  
Unicycler GPL 3.0

SPAdes 3.11.1  
 AntiSMASH 4.0 (antismash.secondarymetabolites.org)  
 FramePlot 4.0beta (http://nocardia.nih.go.jp/fp4/)  
 RAST Server 2.0 (http://rast.nmpdr.org/)  
 NRPSpredictor2 (http://nrps.informatik.uni-tuebingen.de)  
 PKS/NRPS Analysis (http://nrps.igs.umaryland.edu/)  
 Protea Plot 2.0.1.3  
 Gubbs Mass Spec Utilities 8.4.32  
 MATLAB R2015b  
 CYLIB 2.0  
 CYANA 2.1  
 Pymol 2.2.0

For manuscripts utilizing custom algorithms or software that are central to the research but not yet described in published literature, software must be made available to editors/reviewers upon request. We strongly encourage code deposition in a community repository (e.g. GitHub). See the Nature Research [guidelines for submitting code & software](#) for further information.

## Data

Policy information about [availability of data](#)

All manuscripts must include a [data availability statement](#). This statement should provide the following information, where applicable:

- Accession codes, unique identifiers, or web links for publicly available datasets
- A list of figures that have associated raw data
- A description of any restrictions on data availability

The data supporting the findings of this study are available within the paper and the supplementary material. NMR data used to characterize the cryptic metabolites are available from the corresponding author upon reasonable request. The DNA sequence of the ker gene cluster from *A. keratiniphila* has been submitted to GenBank (accession number MH428036). The LAESI-IMS data for *S. canus* and *A. keratiniphila*, including the raw data for Figs. 3a and 4a as well as the source code used to generate the 3D plots, have been submitted to GNPS (accession number MassIVE MSV000082658).

## Field-specific reporting

Please select the best fit for your research. If you are not sure, read the appropriate sections before making your selection.

Life sciences  Behavioural & social sciences  Ecological, evolutionary & environmental sciences

For a reference copy of the document with all sections, see [nature.com/authors/policies/ReportingSummary-flat.pdf](https://www.nature.com/authors/policies/ReportingSummary-flat.pdf)

## Life sciences study design

All studies must disclose on these points even when the disclosure is negative.

|                 |                                                                                                                                                                                                                                                                                                                                                                                                                                                                                                          |
|-----------------|----------------------------------------------------------------------------------------------------------------------------------------------------------------------------------------------------------------------------------------------------------------------------------------------------------------------------------------------------------------------------------------------------------------------------------------------------------------------------------------------------------|
| Sample size     | High-throughput elicitor screening with each of the three bacterial strains followed by imaging mass spectrometry was carried out in a single replicate, as is typical for high-throughput screens. To ensure the hits observed in the high-throughput screen were genuine, they were validated in 96-well plate and flask cultures in 3 independent biological replicates, yielding excellent reproducibility. Typical examples of the validation results by HPLC-MS are shown in Figs. 2c, 3c, and 4c. |
| Data exclusions | No data were excluded from any analyses.                                                                                                                                                                                                                                                                                                                                                                                                                                                                 |
| Replication     | All experimental results could be reliably replicated.                                                                                                                                                                                                                                                                                                                                                                                                                                                   |
| Randomization   | No experimental groups were used in this study, and randomization was therefore not relevant.                                                                                                                                                                                                                                                                                                                                                                                                            |
| Blinding        | Group allocation was not relevant to the experiments in this study.                                                                                                                                                                                                                                                                                                                                                                                                                                      |

## Reporting for specific materials, systems and methods

## Materials &amp; experimental systems

| n/a                                 | Involvement                         | Involved in the study       |
|-------------------------------------|-------------------------------------|-----------------------------|
| <input type="checkbox"/>            | <input checked="" type="checkbox"/> | Unique biological materials |
| <input checked="" type="checkbox"/> | <input type="checkbox"/>            | Antibodies                  |
| <input checked="" type="checkbox"/> | <input type="checkbox"/>            | Eukaryotic cell lines       |
| <input checked="" type="checkbox"/> | <input type="checkbox"/>            | Palaeontology               |
| <input checked="" type="checkbox"/> | <input type="checkbox"/>            | Animals and other organisms |
| <input checked="" type="checkbox"/> | <input type="checkbox"/>            | Human research participants |

## Methods

| n/a                                 | Involvement              | Involved in the study  |
|-------------------------------------|--------------------------|------------------------|
| <input checked="" type="checkbox"/> | <input type="checkbox"/> | ChIP-seq               |
| <input checked="" type="checkbox"/> | <input type="checkbox"/> | Flow cytometry         |
| <input checked="" type="checkbox"/> | <input type="checkbox"/> | MRI-based neuroimaging |

## Unique biological materials

Policy information about [availability of materials](#)

## Obtaining unique materials

Pseudomonas protegens Pf-5 ATCC BAA-477  
 Amycolatopsis keratiniphila subsp. keratiniphila NRRL B-24117  
 Streptomyces canus NRRL B-3980  
 These bacterial strains are available from the American Type Culture Collection (ATCC) and/or the Northern Regional Research Laboratory (NRRL) culture collection.
